# Supplementary material
Source: MDPI journal article supplement (https://www.mdpi.com/2312-7481/8/4/36)
Supplement: s1 [file s1]

# SUPPORTING INFORMATION

## EPR Spectroscopy of Cu(II) Complexes: Prediction of g-Tensors Using Double-Hybrid Density Functional Theory

**Maria Drosou <sup>1,\*</sup>, Christiana A. Mitsopoulou <sup>1</sup>, Maylis Orio <sup>2</sup> and Dimitrios A. Pantazis <sup>3,\*</sup>**

<sup>1</sup> Inorganic Chemistry Laboratory, National and Kapodistrian University of Athens, Panepistimiopolis, Zografou 15771, Greece; mdrosou@chem.uoa.gr, cmitsop@chem.uoa.gr

<sup>2</sup> Aix-Marseille Université, CNRS, iSm2, Marseille, France; maylis.orio@chem.uoa.gr

<sup>3</sup> Max-Planck-Institut für Kohlenforschung, Kaiser-Wilhelm-Platz 1, 45470 Mülheim an der Ruhr, Germany; dimitrios.pantazis@kofo.mpg.de

\*Correspondence: mdrosou@chem.uoa.gr; dimitrios.pantazis@kofo.mpg.de

**Table S1.** Calculated  $\Delta g$ -values (ppt),  $\Delta g^{\text{calc}} = (g^{\text{calc}} - g_e) \cdot 1000$  with  $g_e = 2.0023$ , obtained with the **PBE0** functional, differences (D),  $D(\Delta g) = \Delta g^{\text{calc}} - \Delta g^{\text{exp}}$ , and percent differences (PD),  $PD(\Delta g) = \frac{\Delta g^{\text{calc}} - \Delta g^{\text{exp}}}{\Delta g^{\text{exp}}} \cdot 100$ , from the experimental values of the  $\Delta g$  parameter for the set of 18 Cu(II) complexes.

|    | $\Delta g_{xx}$ | $\Delta g_{yy}$ | $\Delta g_{zz}$ | $D(\Delta g_{\perp})$ | $D(\Delta g_{\parallel})$ | $D(\Delta g_{\parallel} - \Delta g_{\perp})$ | $PD(\Delta g_{\perp})$ | $PD(\Delta g_{\parallel})$ | $PD(\Delta g_{\parallel} - \Delta g_{\perp})$ |
|----|-----------------|-----------------|-----------------|-----------------------|---------------------------|----------------------------------------------|------------------------|----------------------------|-----------------------------------------------|
| 1  | 45              | 45              | 166             | 1                     | -72                       | -73                                          | 1                      | -30                        | -38                                           |
| 2  | 43              | 43              | 163             | -8                    | -97                       | -89                                          | -16                    | -37                        | -43                                           |
| 3  | 45              | 46              | 174             | 1                     | -85                       | -86                                          | 2                      | -33                        | -40                                           |
| 4  | 40              | 40              | 145             | 1                     | -57                       | -58                                          | 3                      | -28                        | -36                                           |
| 5  | 33              | 52              | 156             | -7                    | -109                      | -102                                         | -14                    | -41                        | -47                                           |
| 6  | 39              | 53              | 158             | -4                    | -42                       | -38                                          | -7                     | -21                        | -25                                           |
| 7  | 39              | 49              | 155             | -4                    | -83                       | -78                                          | -9                     | -35                        | -41                                           |
| 8  | 43              | 46              | 158             | -6                    | -93                       | -86                                          | -13                    | -37                        | -43                                           |
| 9  | 52              | 56              | 183             | -6                    | -69                       | -64                                          | -9                     | -27                        | -33                                           |
| 10 | 48              | 51              | 185             | -8                    | -97                       | -90                                          | -14                    | -34                        | -40                                           |
| 11 | 28              | 52              | 149             | -8                    | -53                       | -46                                          | -16                    | -26                        | -29                                           |
| 12 | 41              | 50              | 156             | -8                    | -9                        | -1                                           | -15                    | -5                         | -1                                            |
| 13 | 30              | 65              | 160             | 8                     | -41                       | -48                                          | 19                     | -20                        | -30                                           |
| 14 | 28              | 52              | 135             | -17                   | 23                        | 41                                           | -30                    | 21                         | 74                                            |
| 15 | 30              | 32              | 111             | -5                    | -13                       | -7                                           | -15                    | -10                        | -8                                            |
| 16 | 30              | 48              | 130             | -3                    | -5                        | -2                                           | -7                     | -4                         | -3                                            |
| 17 | 22              | 27              | 87              | 2                     | 5                         | 2                                            | 10                     | 6                          | 4                                             |
| 18 | 37              | 40              | 126             | 14                    | 15                        | 1                                            | 56                     | 13                         | 1                                             |

**Table S2.** Calculated  $\Delta g$ -values (ppt),  $\Delta g^{\text{calc}} = (g^{\text{calc}} - g_e) \cdot 1000$  with  $g_e = 2.0023$ , obtained with the **BHandHLYP** functional, differences (D),  $D(\Delta g) = \Delta g^{\text{calc}} - \Delta g^{\text{exp}}$ , and percent differences (PD),  $PD(\Delta g) = \frac{\Delta g^{\text{calc}} - \Delta g^{\text{exp}}}{\Delta g^{\text{exp}}} \cdot 100$ , from the experimental values of the  $\Delta g$  parameter for the set of 18 Cu(II) complexes.

|    | $\Delta g_{xx}$ | $\Delta g_{yy}$ | $\Delta g_{zz}$ | $D(\Delta g_{\perp})$ | $D(\Delta g_{\parallel})$ | $D(\Delta g_{\parallel} - \Delta g_{\perp})$ | $PD(\Delta g_{\perp})$ | $PD(\Delta g_{\parallel})$ | $PD(\Delta g_{\parallel} - \Delta g_{\perp})$ |
|----|-----------------|-----------------|-----------------|-----------------------|---------------------------|----------------------------------------------|------------------------|----------------------------|-----------------------------------------------|
| 1  | 64              | 64              | 245             | 19                    | 6                         | -13                                          | 43                     | 2                          | -7                                            |
| 2  | 60              | 61              | 242             | 10                    | -18                       | -28                                          | 19                     | -7                         | -13                                           |
| 3  | 62              | 64              | 250             | 18                    | -10                       | -28                                          | 41                     | -4                         | -13                                           |
| 4  | 58              | 58              | 223             | 19                    | 20                        | 1                                            | 50                     | 10                         | 0                                             |
| 5  | 44              | 77              | 229             | 11                    | -35                       | -46                                          | 22                     | -13                        | -22                                           |
| 6  | 53              | 75              | 231             | 14                    | 31                        | 17                                           | 29                     | 16                         | 11                                            |
| 7  | 55              | 66              | 225             | 13                    | -13                       | -26                                          | 28                     | -5                         | -14                                           |
| 8  | 63              | 65              | 235             | 12                    | -16                       | -28                                          | 24                     | -6                         | -14                                           |
| 9  | 75              | 80              | 270             | 18                    | 18                        | 0                                            | 30                     | 7                          | 0                                             |
| 10 | 69              | 71              | 268             | 12                    | -15                       | -27                                          | 21                     | -5                         | -12                                           |
| 11 | 40              | 86              | 232             | 15                    | 29                        | 14                                           | 32                     | 14                         | 9                                             |
| 12 | 64              | 75              | 242             | 16                    | 77                        | 62                                           | 29                     | 47                         | 56                                            |
| 13 | 46              | 107             | 269             | 36                    | 69                        | 32                                           | 90                     | 34                         | 20                                            |
| 14 | 45              | 85              | 221             | 8                     | 110                       | 102                                          | 14                     | 98                         | 187                                           |
| 15 | 57              | 59              | 212             | 21                    | 88                        | 66                                           | 58                     | 71                         | 76                                            |
| 16 | 50              | 76              | 217             | 21                    | 81                        | 60                                           | 50                     | 60                         | 64                                            |
| 17 | 45              | 46              | 175             | 23                    | 92                        | 69                                           | 101                    | 111                        | 115                                           |
| 18 | 73              | 75              | 241             | 49                    | 129                       | 80                                           | 199                    | 116                        | 92                                            |

**Table S3.** Calculated  $\Delta g$ -values (ppt),  $\Delta g^{\text{calc}} = (g^{\text{calc}} - g_e) \cdot 1000$  with  $g_e = 2.0023$ , obtained with the **B3LYP** functional, differences (D),  $D(\Delta g) = \Delta g^{\text{calc}} - \Delta g^{\text{exp}}$ , and percent differences (PD),  $PD(\Delta g) = \frac{\Delta g^{\text{calc}} - \Delta g^{\text{exp}}}{\Delta g^{\text{exp}}} \cdot 100$ , from the experimental values of the  $\Delta g$  parameter for the set of 18 Cu(II) complexes.

|    | $\Delta g_{xx}$ | $\Delta g_{yy}$ | $\Delta g_{zz}$ | $D(\Delta g_{\perp})$ | $D(\Delta g_{\parallel})$ | $D(\Delta g_{\parallel} - \Delta g_{\perp})$ | $PD(\Delta g_{\perp})$ | $PD(\Delta g_{\parallel})$ | $PD(\Delta g_{\parallel} - \Delta g_{\perp})$ |
|----|-----------------|-----------------|-----------------|-----------------------|---------------------------|----------------------------------------------|------------------------|----------------------------|-----------------------------------------------|
| 1  | 41              | 41              | 149             | -4                    | -89                       | -86                                          | -9                     | -37                        | -44                                           |
| 2  | 38              | 38              | 146             | -12                   | -115                      | -102                                         | -24                    | -44                        | -49                                           |
| 3  | 40              | 41              | 157             | -4                    | -103                      | -99                                          | -8                     | -40                        | -46                                           |
| 4  | 36              | 36              | 129             | -3                    | -73                       | -70                                          | -8                     | -36                        | -43                                           |
| 5  | 30              | 46              | 140             | -12                   | -125                      | -113                                         | -23                    | -47                        | -53                                           |
| 6  | 35              | 48              | 142             | -8                    | -58                       | -49                                          | -17                    | -29                        | -33                                           |
| 7  | 34              | 44              | 140             | -8                    | -98                       | -89                                          | -17                    | -41                        | -47                                           |
| 8  | 39              | 42              | 142             | -11                   | -109                      | -98                                          | -21                    | -44                        | -49                                           |
| 9  | 46              | 50              | 163             | -11                   | -89                       | -78                                          | -19                    | -35                        | -40                                           |
| 10 | 43              | 47              | 166             | -13                   | -117                      | -104                                         | -22                    | -41                        | -46                                           |
| 11 | 26              | 44              | 132             | -13                   | -71                       | -58                                          | -27                    | -35                        | -37                                           |
| 12 | 36              | 44              | 138             | -13                   | -27                       | -13                                          | -25                    | -16                        | -12                                           |
| 13 | 27              | 56              | 138             | 1                     | -63                       | -64                                          | 3                      | -31                        | -40                                           |
| 14 | 24              | 45              | 118             | -22                   | 6                         | 29                                           | -39                    | 6                          | 53                                            |
| 15 | 26              | 28              | 94              | -10                   | -30                       | -20                                          | -26                    | -24                        | -23                                           |
| 16 | 26              | 42              | 114             | -8                    | -22                       | -14                                          | -18                    | -16                        | -15                                           |
| 17 | 19              | 25              | 73              | -1                    | -10                       | -9                                           | -4                     | -12                        | -15                                           |
| 18 | 30              | 34              | 106             | 7                     | -5                        | -13                                          | 30                     | -5                         | -15                                           |

**Table S4.** Calculated  $\Delta g$ -values (ppt),  $\Delta g^{\text{calc}} = (g^{\text{calc}} - g_e) \cdot 1000$  with  $g_e = 2.0023$ , obtained with the **B2PLYP** functional, differences (D),  $D(\Delta g) = \Delta g^{\text{calc}} - \Delta g^{\text{exp}}$ , and percent differences (PD),  $PD(\Delta g) = \frac{\Delta g^{\text{calc}} - \Delta g^{\text{exp}}}{\Delta g^{\text{exp}}} \cdot 100$ , from the experimental values of the  $\Delta g$  parameter for the set of 18 Cu(II) complexes.

|    | $\Delta g_{xx}$ | $\Delta g_{yy}$ | $\Delta g_{zz}$ | $D(\Delta g_{\perp})$ | $D(\Delta g_{\parallel})$ | $D(\Delta g_{\parallel} - \Delta g_{\perp})$ | $PD(\Delta g_{\perp})$ | $PD(\Delta g_{\parallel})$ | $PD(\Delta g_{\parallel} - \Delta g_{\perp})$ |
|----|-----------------|-----------------|-----------------|-----------------------|---------------------------|----------------------------------------------|------------------------|----------------------------|-----------------------------------------------|
| 1  | 42              | 42              | 173             | -3                    | -65                       | -62                                          | -7                     | -27                        | -32                                           |
| 2  | 38              | 38              | 166             | -12                   | -95                       | -83                                          | -24                    | -36                        | -39                                           |
| 3  | 42              | 43              | 183             | -2                    | -76                       | -74                                          | -5                     | -29                        | -34                                           |
| 4  | 34              | 35              | 142             | -4                    | -60                       | -56                                          | -11                    | -30                        | -34                                           |
| 5  | 32              | 49              | 165             | -10                   | -100                      | -91                                          | -19                    | -38                        | -42                                           |
| 6  | 37              | 51              | 167             | -6                    | -33                       | -27                                          | -12                    | -17                        | -18                                           |
| 7  | 36              | 47              | 164             | -6                    | -74                       | -68                                          | -13                    | -31                        | -36                                           |
| 8  | 41              | 44              | 168             | -9                    | -83                       | -74                                          | -17                    | -33                        | -37                                           |
| 9  | 51              | 55              | 201             | -7                    | -50                       | -44                                          | -11                    | -20                        | -23                                           |
| 10 | 49              | 52              | 208             | -8                    | -75                       | -68                                          | -13                    | -27                        | -30                                           |
| 11 | 23              | 38              | 137             | -17                   | -65                       | -48                                          | -36                    | -32                        | -31                                           |
| 12 | 36              | 43              | 157             | -14                   | -7                        | 6                                            | -26                    | -5                         | 6                                             |
| 13 | 27              | 59              | 169             | 3                     | -32                       | -35                                          | 7                      | -16                        | -22                                           |
| 14 | 20              | 33              | 115             | -31                   | 3                         | 34                                           | -54                    | 3                          | 63                                            |
| 15 | 1               | 8               | 51              | -32                   | -72                       | -40                                          | -88                    | -58                        | -46                                           |
| 16 | 19              | 32              | 109             | -16                   | -27                       | -11                                          | -39                    | -20                        | -12                                           |
| 17 | -8              | -3              | 6               | -28                   | -77                       | -49                                          | -124                   | -93                        | -81                                           |
| 18 | 11              | 15              | 75              | -12                   | -37                       | -25                                          | -48                    | -33                        | -28                                           |

**Table S5.** Calculated  $\Delta g$ -values (ppt),  $\Delta g^{\text{calc}} = (g^{\text{calc}} - g_e) \cdot 1000$  with  $g_e = 2.0023$ , obtained with the **mPW2PLYP** functional, differences (D),  $D(\Delta g) = \Delta g^{\text{calc}} - \Delta g^{\text{exp}}$ , and percent differences (PD),  $PD(\Delta g) = \frac{\Delta g^{\text{calc}} - \Delta g^{\text{exp}}}{\Delta g^{\text{exp}}} \cdot 100$ , from the experimental values of the  $\Delta g$  parameter for the set of 18 Cu(II) complexes.

|    | $\Delta g_{xx}$ | $\Delta g_{yy}$ | $\Delta g_{zz}$ | $D(\Delta g_{\perp})$ | $D(\Delta g_{\parallel})$ | $D(\Delta g_{\parallel} - \Delta g_{\perp})$ | $PD(\Delta g_{\perp})$ | $PD(\Delta g_{\parallel})$ | $PD(\Delta g_{\parallel} - \Delta g_{\perp})$ |
|----|-----------------|-----------------|-----------------|-----------------------|---------------------------|----------------------------------------------|------------------------|----------------------------|-----------------------------------------------|
| 1  | 46              | 46              | 189             | 1                     | -50                       | -51                                          | 2                      | -21                        | -26                                           |
| 2  | 43              | 43              | 182             | -8                    | -79                       | -70                                          | -16                    | -30                        | -34                                           |
| 3  | 46              | 47              | 198             | 2                     | -61                       | -63                                          | 3                      | -24                        | -29                                           |
| 4  | 39              | 39              | 159             | 0                     | -44                       | -44                                          | 0                      | -22                        | -27                                           |
| 5  | 34              | 54              | 179             | -6                    | -86                       | -80                                          | -11                    | -32                        | -37                                           |
| 6  | 40              | 56              | 181             | -2                    | -19                       | -17                                          | -4                     | -9                         | -11                                           |
| 7  | 40              | 51              | 177             | -2                    | -60                       | -58                                          | -5                     | -25                        | -30                                           |
| 8  | 45              | 48              | 183             | -4                    | -68                       | -63                                          | -9                     | -27                        | -32                                           |
| 9  | 56              | 60              | 218             | -2                    | -34                       | -32                                          | -3                     | -13                        | -17                                           |
| 10 | 53              | 55              | 223             | -3                    | -60                       | -56                                          | -6                     | -21                        | -25                                           |
| 11 | 26              | 46              | 156             | -11                   | -46                       | -35                                          | -24                    | -23                        | -22                                           |
| 12 | 42              | 49              | 175             | -8                    | 11                        | 19                                           | -15                    | 7                          | 17                                            |
| 13 | 31              | 69              | 192             | 10                    | -8                        | -18                                          | 24                     | -4                         | -11                                           |
| 14 | 24              | 42              | 136             | -24                   | 24                        | 48                                           | -42                    | 22                         | 88                                            |
| 15 | 11              | 16              | 80              | -23                   | -44                       | -21                                          | -64                    | -36                        | -24                                           |
| 16 | 24              | 40              | 129             | -10                   | -6                        | 3                                            | -23                    | -5                         | 4                                             |
| 17 | -1              | 4               | 32              | -21                   | -51                       | -29                                          | -93                    | -61                        | -49                                           |
| 18 | 22              | 25              | 107             | -1                    | -5                        | -4                                           | -5                     | -5                         | -4                                            |

**Table S6.** Calculated  $\Delta g$ -values (ppt),  $\Delta g^{\text{calc}} = (g^{\text{calc}} - g_e) \cdot 1000$  with  $g_e = 2.0023$ , obtained with the **B2GP-PLYP** functional, differences (D),  $D(\Delta g) = \Delta g^{\text{calc}} - \Delta g^{\text{exp}}$ , and percent differences (PD),  $PD(\Delta g) = \frac{\Delta g^{\text{calc}} - \Delta g^{\text{exp}}}{\Delta g^{\text{exp}}} \cdot 100$ , from the experimental values of the  $\Delta g$  parameter for the set of 18 Cu(II) complexes.

|    | $\Delta g_{xx}$ | $\Delta g_{yy}$ | $\Delta g_{zz}$ | $D(\Delta g_{\perp})$ | $D(\Delta g_{\parallel})$ | $D(\Delta g_{\parallel} - \Delta g_{\perp})$ | $PD(\Delta g_{\perp})$ | $PD(\Delta g_{\parallel})$ | $PD(\Delta g_{\parallel} - \Delta g_{\perp})$ |
|----|-----------------|-----------------|-----------------|-----------------------|---------------------------|----------------------------------------------|------------------------|----------------------------|-----------------------------------------------|
| 1  | 50              | 50              | 213             | 5                     | -26                       | -30                                          | 11                     | -11                        | -16                                           |
| 2  | 47              | 47              | 207             | -4                    | -53                       | -49                                          | -8                     | -21                        | -24                                           |
| 3  | 49              | 51              | 223             | 5                     | -37                       | -42                                          | 12                     | -14                        | -20                                           |
| 4  | 42              | 43              | 181             | 4                     | -22                       | -26                                          | 10                     | -11                        | -16                                           |
| 5  | 37              | 59              | 202             | -2                    | -63                       | -61                                          | -3                     | -24                        | -29                                           |
| 6  | 43              | 61              | 205             | 2                     | 5                         | 3                                            | 5                      | 3                          | 2                                             |
| 7  | 44              | 55              | 199             | 2                     | -39                       | -40                                          | 3                      | -16                        | -21                                           |
| 8  | 50              | 52              | 208             | 0                     | -43                       | -43                                          | 0                      | -17                        | -21                                           |
| 9  | 62              | 67              | 249             | 4                     | -3                        | -7                                           | 7                      | -1                         | -4                                            |
| 10 | 58              | 60              | 253             | 2                     | -30                       | -31                                          | 3                      | -10                        | -14                                           |
| 11 | 30              | 54              | 186             | -6                    | -16                       | -10                                          | -12                    | -8                         | -7                                            |
| 12 | 48              | 56              | 204             | -2                    | 40                        | 42                                           | -4                     | 24                         | 38                                            |
| 13 | 36              | 82              | 235             | 19                    | 34                        | 15                                           | 47                     | 17                         | 10                                            |
| 14 | 30              | 50              | 165             | -17                   | 53                        | 71                                           | -30                    | 48                         | 130                                           |
| 15 | 21              | 24              | 116             | -14                   | -8                        | 6                                            | -39                    | -6                         | 7                                             |
| 16 | 30              | 46              | 158             | -4                    | 22                        | 26                                           | -9                     | 16                         | 28                                            |
| 17 | 3               | 4               | 53              | -19                   | -30                       | -10                                          | -86                    | -36                        | -17                                           |
| 18 | 34              | 36              | 152             | 10                    | 40                        | 30                                           | 42                     | 36                         | 34                                            |

**Table S7.** Calculated  $\Delta g$ -values (ppt),  $\Delta g^{\text{calc}} = (g^{\text{calc}} - g_e) \cdot 1000$  with  $g_e = 2.0023$ , obtained with the **B2K-PLYP** functional, differences (D),  $D(\Delta g) = \Delta g^{\text{calc}} - \Delta g^{\text{exp}}$ , and percent differences (PD),  $PD(\Delta g) = \frac{\Delta g^{\text{calc}} - \Delta g^{\text{exp}}}{\Delta g^{\text{exp}}} \cdot 100$ , from the experimental values of the  $\Delta g$  parameter for the set of 18 Cu(II) complexes.

|    | $\Delta g_{xx}$ | $\Delta g_{yy}$ | $\Delta g_{zz}$ | $D(\Delta g_{\perp})$ | $D(\Delta g_{\parallel})$ | $D(\Delta g_{\parallel} - \Delta g_{\perp})$ | $PD(\Delta g_{\perp})$ | $PD(\Delta g_{\parallel})$ | $PD(\Delta g_{\parallel} - \Delta g_{\perp})$ |
|----|-----------------|-----------------|-----------------|-----------------------|---------------------------|----------------------------------------------|------------------------|----------------------------|-----------------------------------------------|
| 1  | 54              | 54              | 240             | 10                    | 1                         | -8                                           | 22                     | 1                          | -4                                            |
| 2  | 52              | 52              | 235             | 1                     | -26                       | -27                                          | 2                      | -10                        | -13                                           |
| 3  | 54              | 55              | 249             | 10                    | -11                       | -21                                          | 22                     | -4                         | -10                                           |
| 4  | 47              | 48              | 207             | 9                     | 4                         | -5                                           | 23                     | 2                          | -3                                            |
| 5  | 40              | 65              | 226             | 3                     | -39                       | -42                                          | 6                      | -15                        | -19                                           |
| 6  | 46              | 67              | 235             | 7                     | 35                        | 28                                           | 14                     | 18                         | 19                                            |
| 7  | 48              | 59              | 221             | 6                     | -16                       | -22                                          | 12                     | -7                         | -12                                           |
| 8  | 55              | 57              | 233             | 5                     | -17                       | -22                                          | 9                      | -7                         | -11                                           |
| 9  | 67              | 73              | 280             | 11                    | 28                        | 18                                           | 18                     | 11                         | 9                                             |
| 10 | 63              | 65              | 282             | 7                     | -1                        | -7                                           | 11                     | 0                          | -3                                            |
| 11 | 34              | 63              | 223             | 0                     | 21                        | 20                                           | 1                      | 10                         | 13                                            |
| 12 | 54              | 63              | 236             | 5                     | 71                        | 66                                           | 9                      | 43                         | 59                                            |
| 13 | 42              | 95              | 276             | 28                    | 76                        | 48                                           | 70                     | 38                         | 30                                            |
| 14 | 33              | 69              | 209             | -6                    | 97                        | 103                                          | -11                    | 87                         | 190                                           |
| 15 | 34              | 35              | 163             | -2                    | 39                        | 41                                           | -5                     | 31                         | 47                                            |
| 16 | 35              | 53              | 208             | 2                     | 73                        | 71                                           | 5                      | 54                         | 75                                            |
| 17 | 14              | 14              | 97              | -9                    | 14                        | 23                                           | -38                    | 17                         | 38                                            |
| 18 | 49              | 51              | 205             | 25                    | 93                        | 68                                           | 102                    | 83                         | 78                                            |



**Table S8.** Calculated  $\Delta g$ -values (ppt),  $\Delta g^{\text{calc}} = (g^{\text{calc}} - g_e) \cdot 1000$  with  $g_e = 2.0023$ , obtained with the **B2T-PLYP** functional, differences (D),  $D(\Delta g) = \Delta g^{\text{calc}} - \Delta g^{\text{exp}}$ , and percent differences (PD),  $PD(\Delta g) = \frac{\Delta g^{\text{calc}} - \Delta g^{\text{exp}}}{\Delta g^{\text{exp}}} \cdot 100$ , from the experimental values of the  $\Delta g$  parameter for the set of 18 Cu(II) complexes.

|    | $\Delta g_{xx}$ | $\Delta g_{yy}$ | $\Delta g_{zz}$ | $D(\Delta g_{\perp})$ | $D(\Delta g_{\parallel})$ | $D(\Delta g_{\parallel} - \Delta g_{\perp})$ | $PD(\Delta g_{\perp})$ | $PD(\Delta g_{\parallel})$ | $PD(\Delta g_{\parallel} - \Delta g_{\perp})$ |
|----|-----------------|-----------------|-----------------|-----------------------|---------------------------|----------------------------------------------|------------------------|----------------------------|-----------------------------------------------|
| 1  | 47              | 47              | 198             | 2                     | -40                       | -43                                          | 5                      | -17                        | -22                                           |
| 2  | 44              | 44              | 192             | -7                    | -69                       | -62                                          | -13                    | -26                        | -30                                           |
| 3  | 47              | 48              | 208             | 3                     | -51                       | -54                                          | 7                      | -20                        | -25                                           |
| 4  | 40              | 40              | 167             | 1                     | -36                       | -37                                          | 3                      | -18                        | -23                                           |
| 5  | 35              | 56              | 188             | -4                    | -77                       | -72                                          | -8                     | -29                        | -34                                           |
| 6  | 41              | 57              | 191             | 0                     | -9                        | -9                                           | -1                     | -5                         | -6                                            |
| 7  | 41              | 52              | 186             | -1                    | -52                       | -51                                          | -2                     | -22                        | -27                                           |
| 8  | 47              | 50              | 193             | -3                    | -58                       | -55                                          | -5                     | -23                        | -27                                           |
| 9  | 58              | 63              | 231             | 1                     | -21                       | -21                                          | 1                      | -8                         | -11                                           |
| 10 | 55              | 57              | 236             | -1                    | -47                       | -45                                          | -3                     | -17                        | -20                                           |
| 11 | 28              | 49              | 167             | -10                   | -35                       | -26                                          | -20                    | -17                        | -17                                           |
| 12 | 44              | 51              | 187             | -6                    | 22                        | 28                                           | -11                    | 13                         | 25                                            |
| 13 | 33              | 74              | 210             | 13                    | 10                        | -4                                           | 34                     | 5                          | -2                                            |
| 14 | 26              | 44              | 146             | -22                   | 34                        | 56                                           | -39                    | 31                         | 104                                           |
| 15 | 13              | 18              | 91              | -21                   | -33                       | -12                                          | -57                    | -26                        | -13                                           |
| 16 | 26              | 41              | 139             | -8                    | 3                         | 11                                           | -19                    | 3                          | 12                                            |
| 17 | -2              | 1               | 34              | -23                   | -49                       | -26                                          | -102                   | -59                        | -43                                           |
| 18 | 26              | 28              | 123             | 2                     | 11                        | 9                                            | 10                     | 10                         | 10                                            |

**Table S9.** Calculated  $\Delta g$ -values (ppt),  $\Delta g^{\text{calc}} = (g^{\text{calc}} - g_e) \cdot 1000$  with  $g_e = 2.0023$ , obtained with the **PBE-QIDH** functional, differences (D),  $D(\Delta g) = \Delta g^{\text{calc}} - \Delta g^{\text{exp}}$ , and percent differences (PD),  $PD(\Delta g) = \frac{\Delta g^{\text{calc}} - \Delta g^{\text{exp}}}{\Delta g^{\text{exp}}} \cdot 100$ , from the experimental values of the  $\Delta g$  parameter for the set of 18 Cu(II) complexes.

|    | $\Delta g_{xx}$ | $\Delta g_{yy}$ | $\Delta g_{zz}$ | $D(\Delta g_{\perp})$ | $D(\Delta g_{\parallel})$ | $D(\Delta g_{\parallel} - \Delta g_{\perp})$ | $PD(\Delta g_{\perp})$ | $PD(\Delta g_{\parallel})$ | $PD(\Delta g_{\parallel} - \Delta g_{\perp})$ |
|----|-----------------|-----------------|-----------------|-----------------------|---------------------------|----------------------------------------------|------------------------|----------------------------|-----------------------------------------------|
| 1  | 57              | 57              | 247             | 12                    | 8                         | -4                                           | 27                     | 3                          | -2                                            |
| 2  | 54              | 54              | 242             | 3                     | -19                       | -22                                          | 6                      | -7                         | -10                                           |
| 3  | 56              | 58              | 256             | 12                    | -4                        | -16                                          | 27                     | -2                         | -8                                            |
| 4  | 50              | 50              | 215             | 11                    | 12                        | 1                                            | 29                     | 6                          | 1                                             |
| 5  | 41              | 68              | 232             | 5                     | -33                       | -38                                          | 10                     | -13                        | -18                                           |
| 6  | 48              | 69              | 237             | 9                     | 37                        | 28                                           | 18                     | 19                         | 19                                            |
| 7  | 50              | 61              | 226             | 8                     | -12                       | -19                                          | 16                     | -5                         | -10                                           |
| 8  | 57              | 59              | 239             | 7                     | -12                       | -19                                          | 13                     | -5                         | -9                                            |
| 9  | 70              | 75              | 285             | 13                    | 33                        | 21                                           | 21                     | 13                         | 11                                            |
| 10 | 65              | 67              | 286             | 8                     | 4                         | -4                                           | 14                     | 1                          | -2                                            |
| 11 | 35              | 68              | 230             | 4                     | 28                        | 24                                           | 8                      | 14                         | 16                                            |
| 12 | 57              | 66              | 242             | 8                     | 77                        | 69                                           | 14                     | 47                         | 62                                            |
| 13 | 42              | 99              | 282             | 30                    | 81                        | 51                                           | 75                     | 40                         | 32                                            |
| 14 | 37              | 69              | 210             | -4                    | 99                        | 103                                          | -7                     | 88                         | 188                                           |
| 15 | 39              | 40              | 175             | 3                     | 52                        | 49                                           | 8                      | 42                         | 56                                            |
| 16 | 39              | 58              | 207             | 7                     | 72                        | 64                                           | 17                     | 53                         | 69                                            |
| 17 | 20              | 20              | 112             | -3                    | 29                        | 32                                           | -13                    | 36                         | 54                                            |
| 18 | 54              | 56              | 218             | 30                    | 106                       | 76                                           | 123                    | 95                         | 87                                            |

**Table S10.** Calculated  $\Delta g$ -values (ppt),  $\Delta g^{\text{calc}} = (g^{\text{calc}} - g_e) \cdot 1000$  with  $g_e = 2.0023$ , obtained with the **PBE0-DH** functional, differences (D),  $D(\Delta g) = \Delta g^{\text{calc}} - \Delta g^{\text{exp}}$ , and percent differences (PD),  $PD(\Delta g) = \frac{\Delta g^{\text{calc}} - \Delta g^{\text{exp}}}{\Delta g^{\text{exp}}} \cdot 100$ , from the experimental values of the  $\Delta g$  parameter for the set of 18 Cu(II) complexes.

|    | $\Delta g_{xx}$ | $\Delta g_{yy}$ | $\Delta g_{zz}$ | $D(\Delta g_{\perp})$ | $D(\Delta g_{\parallel})$ | $D(\Delta g_{\parallel} - \Delta g_{\perp})$ | $PD(\Delta g_{\perp})$ | $PD(\Delta g_{\parallel})$ | $PD(\Delta g_{\parallel} - \Delta g_{\perp})$ |
|----|-----------------|-----------------|-----------------|-----------------------|---------------------------|----------------------------------------------|------------------------|----------------------------|-----------------------------------------------|
| 1  | 52              | 53              | 209             | 8                     | -29                       | -37                                          | 18                     | -12                        | -19                                           |
| 2  | 49              | 49              | 204             | -1                    | -57                       | -55                                          | -3                     | -22                        | -26                                           |
| 3  | 52              | 53              | 209             | 8                     | -50                       | -58                                          | 18                     | -19                        | -27                                           |
| 4  | 46              | 46              | 183             | 7                     | -20                       | -28                                          | 19                     | -10                        | -17                                           |
| 5  | 38              | 62              | 197             | 0                     | -68                       | -68                                          | 1                      | -26                        | -32                                           |
| 6  | 45              | 63              | 198             | 4                     | -1                        | -5                                           | 8                      | -1                         | -4                                            |
| 7  | 46              | 56              | 194             | 3                     | -44                       | -47                                          | 7                      | -19                        | -25                                           |
| 8  | 57              | 59              | 239             | 7                     | -12                       | -19                                          | 13                     | -5                         | -9                                            |
| 9  | 63              | 67              | 236             | 5                     | -16                       | -21                                          | 9                      | -6                         | -11                                           |
| 10 | 59              | 61              | 238             | 2                     | -44                       | -46                                          | 3                      | -16                        | -21                                           |
| 11 | 31              | 61              | 184             | -1                    | -18                       | -17                                          | -3                     | -9                         | -11                                           |
| 12 | 49              | 59              | 199             | 0                     | 34                        | 33                                           | 1                      | 21                         | 30                                            |
| 13 | 36              | 82              | 217             | 19                    | 16                        | -3                                           | 47                     | 8                          | -2                                            |
| 14 | 32              | 59              | 167             | -12                   | 55                        | 67                                           | -21                    | 49                         | 123                                           |
| 15 | 31              | 33              | 130             | -5                    | 7                         | 12                                           | -14                    | 6                          | 14                                            |
| 16 | 34              | 54              | 162             | 2                     | 26                        | 24                                           | 6                      | 19                         | 25                                            |
| 17 | 20              | 23              | 92              | -1                    | 9                         | 11                                           | -6                     | 11                         | 18                                            |
| 18 | 41              | 44              | 157             | 18                    | 45                        | 27                                           | 73                     | 41                         | 31                                            |

**Table S11.** Calculated  $\Delta g$ -values (ppt),  $\Delta g^{\text{calc}} = (g^{\text{calc}} - g_e) \cdot 1000$  with  $g_e = 2.0023$ , obtained with the **DSD-BLYP** functional, differences (D),  $D(\Delta g) = \Delta g^{\text{calc}} - \Delta g^{\text{exp}}$ , and percent differences (PD),  $PD(\Delta g) = \frac{\Delta g^{\text{calc}} - \Delta g^{\text{exp}}}{\Delta g^{\text{exp}}} \cdot 100$ , from the experimental values of the  $\Delta g$  parameter for the set of 18 Cu(II) complexes.

|    | $\Delta g_{xx}$ | $\Delta g_{yy}$ | $\Delta g_{zz}$ | $D(\Delta g_{\perp})$ | $D(\Delta g_{\parallel})$ | $D(\Delta g_{\parallel} - \Delta g_{\perp})$ | $PD(\Delta g_{\perp})$ | $PD(\Delta g_{\parallel})$ | $PD(\Delta g_{\parallel} - \Delta g_{\perp})$ |
|----|-----------------|-----------------|-----------------|-----------------------|---------------------------|----------------------------------------------|------------------------|----------------------------|-----------------------------------------------|
| 1  | 53              | 53              | 242             | 8                     | 3                         | -5                                           | 19                     | 1                          | -3                                            |
| 2  | 50              | 50              | 237             | 0                     | -24                       | -23                                          | -1                     | -9                         | -11                                           |
| 3  | 53              | 54              | 252             | 9                     | -8                        | -17                                          | 20                     | -3                         | -8                                            |
| 4  | 46              | 46              | 206             | 7                     | 3                         | -4                                           | 18                     | 2                          | -2                                            |
| 5  | 40              | 63              | 228             | 2                     | -37                       | -39                                          | 4                      | -14                        | -18                                           |
| 6  | 44              | 68              | 252             | 6                     | 52                        | 46                                           | 13                     | 26                         | 31                                            |
| 7  | 46              | 59              | 223             | 5                     | -15                       | -20                                          | 10                     | -6                         | -10                                           |
| 8  | 54              | 56              | 236             | 4                     | -15                       | -19                                          | 8                      | -6                         | -9                                            |
| 9  | 67              | 73              | 286             | 10                    | 35                        | 25                                           | 17                     | 14                         | 13                                            |
| 10 | 63              | 64              | 288             | 6                     | 6                         | 0                                            | 10                     | 2                          | 0                                             |
| 11 | 34              | 60              | 223             | -1                    | 20                        | 21                                           | -1                     | 10                         | 13                                            |
| 12 | 54              | 62              | 240             | 4                     | 75                        | 71                                           | 8                      | 45                         | 64                                            |
| 13 | 43              | 94              | 285             | 28                    | 84                        | 56                                           | 70                     | 42                         | 35                                            |
| 14 | 28              | 75              | 217             | -6                    | 106                       | 111                                          | -10                    | 95                         | 205                                           |
| 15 | 32              | 33              | 160             | -4                    | 37                        | 41                                           | -12                    | 30                         | 47                                            |
| 16 | 33              | 51              | 216             | 0                     | 80                        | 80                                           | 1                      | 59                         | 85                                            |
| 17 | 9               | 10              | 88              | -13                   | 5                         | 19                                           | -58                    | 7                          | 31                                            |
| 18 | 46              | 48              | 206             | 23                    | 94                        | 72                                           | 92                     | 84                         | 82                                            |

**Table S12.** Calculated  $\Delta g$ -values (ppt),  $\Delta g^{\text{calc}} = (g^{\text{calc}} - g_e) \cdot 1000$  with  $g_e = 2.0023$ , obtained with the **DSD-PBEP86** functional, differences (D),  $D(\Delta g) = \Delta g^{\text{calc}} - \Delta g^{\text{exp}}$ , and percent differences (PD),  $PD(\Delta g) = \frac{\Delta g^{\text{calc}} - \Delta g^{\text{exp}}}{\Delta g^{\text{exp}}} \cdot 100$ , from the experimental values of the  $\Delta g$  parameter for the set of 18 Cu(II) complexes.

|    | $\Delta g_{xx}$ | $\Delta g_{yy}$ | $\Delta g_{zz}$ | $D(\Delta g_{\perp})$ | $D(\Delta g_{\parallel})$ | $D(\Delta g_{\parallel} - \Delta g_{\perp})$ | $PD(\Delta g_{\perp})$ | $PD(\Delta g_{\parallel})$ | $PD(\Delta g_{\parallel} - \Delta g_{\perp})$ |
|----|-----------------|-----------------|-----------------|-----------------------|---------------------------|----------------------------------------------|------------------------|----------------------------|-----------------------------------------------|
| 1  | 53              | 53              | 235             | 9                     | -4                        | -13                                          | 19                     | -2                         | -7                                            |
| 2  | 51              | 51              | 231             | 0                     | -30                       | -30                                          | 0                      | -11                        | -14                                           |
| 3  | 53              | 54              | 244             | 9                     | -15                       | -24                                          | 20                     | -6                         | -11                                           |
| 4  | 46              | 46              | 201             | 8                     | -2                        | -9                                           | 20                     | -1                         | -6                                            |
| 5  | 40              | 63              | 221             | 2                     | -43                       | -45                                          | 4                      | -16                        | -21                                           |
| 6  | 45              | 68              | 247             | 7                     | 47                        | 41                                           | 13                     | 24                         | 27                                            |
| 7  | 47              | 58              | 217             | 5                     | -21                       | -26                                          | 10                     | -9                         | -14                                           |
| 8  | 54              | 56              | 229             | 4                     | -22                       | -26                                          | 8                      | -9                         | -13                                           |
| 9  | 66              | 72              | 275             | 10                    | 24                        | 14                                           | 16                     | 9                          | 7                                             |
| 10 | 62              | 64              | 278             | 6                     | -5                        | -11                                          | 10                     | -2                         | -5                                            |
| 11 | 34              | 60              | 216             | 0                     | 13                        | 14                                           | 0                      | 7                          | 9                                             |
| 12 | 54              | 62              | 233             | 5                     | 68                        | 64                                           | 8                      | 42                         | 58                                            |
| 13 | 42              | 93              | 273             | 28                    | 73                        | 45                                           | 68                     | 36                         | 28                                            |
| 14 | 29              | 75              | 212             | -5                    | 101                       | 106                                          | -9                     | 90                         | 194                                           |
| 15 | 33              | 34              | 156             | -3                    | 32                        | 36                                           | -9                     | 26                         | 41                                            |
| 16 | 34              | 54              | 208             | 2                     | 73                        | 71                                           | 5                      | 54                         | 75                                            |
| 17 | 12              | 12              | 89              | -11                   | 6                         | 17                                           | -46                    | 8                          | 28                                            |
| 18 | 48              | 50              | 199             | 24                    | 87                        | 63                                           | 97                     | 78                         | 73                                            |

**Table S13.** Calculated  $\Delta g$ -values (ppt),  $\Delta g^{\text{calc}} = (g^{\text{calc}} - g_e) \cdot 1000$  with  $g_e = 2.0023$ , obtained with the  $\omega\text{B2PLYP}$  functional, differences (D),  $D(\Delta g) = \Delta g^{\text{calc}} - \Delta g^{\text{exp}}$ , and percent differences (PD),  $\text{PD}(\Delta g) = \frac{\Delta g^{\text{calc}} - \Delta g^{\text{exp}}}{\Delta g^{\text{exp}}} \cdot 100$ , from the experimental values of the  $\Delta g$  parameter for the set of 18 Cu(II) complexes.

|    | $\Delta g_{xx}$ | $\Delta g_{yy}$ | $\Delta g_{zz}$ | $D(\Delta g_{\perp})$ | $D(\Delta g_{\parallel})$ | $D(\Delta g_{\parallel} - \Delta g_{\perp})$ | $\text{PD}(\Delta g_{\perp})$ | $\text{PD}(\Delta g_{\parallel})$ | $\text{PD}(\Delta g_{\parallel} - \Delta g_{\perp})$ |
|----|-----------------|-----------------|-----------------|-----------------------|---------------------------|----------------------------------------------|-------------------------------|-----------------------------------|------------------------------------------------------|
| 1  | 49              | 49              | 203             | 5                     | -36                       | -40                                          | 10                            | -15                               | -21                                                  |
| 2  | 46              | 46              | 197             | -5                    | -64                       | -59                                          | -9                            | -25                               | -28                                                  |
| 3  | 49              | 50              | 211             | 5                     | -49                       | -53                                          | 10                            | -19                               | -25                                                  |
| 4  | 42              | 43              | 174             | 4                     | -29                       | -33                                          | 10                            | -14                               | -20                                                  |
| 5  | 36              | 59              | 193             | -2                    | -72                       | -70                                          | -4                            | -27                               | -32                                                  |
| 6  | 43              | 60              | 195             | 2                     | -4                        | -6                                           | 4                             | -2                                | -4                                                   |
| 7  | 43              | 54              | 190             | 1                     | -48                       | -49                                          | 2                             | -20                               | -26                                                  |
| 8  | 50              | 52              | 198             | 0                     | -52                       | -52                                          | -1                            | -21                               | -26                                                  |
| 9  | 61              | 66              | 236             | 4                     | -16                       | -19                                          | 6                             | -6                                | -10                                                  |
| 10 | 58              | 60              | 240             | 1                     | -42                       | -44                                          | 2                             | -15                               | -19                                                  |
| 11 | 29              | 52              | 173             | -7                    | -30                       | -23                                          | -14                           | -15                               | -15                                                  |
| 12 | 47              | 55              | 193             | -3                    | 28                        | 32                                           | -6                            | 17                                | 28                                                   |
| 13 | 35              | 79              | 219             | 17                    | 18                        | 2                                            | 42                            | 9                                 | 1                                                    |
| 14 | 29              | 50              | 156             | -18                   | 45                        | 63                                           | -31                           | 40                                | 115                                                  |
| 15 | 20              | 24              | 109             | -15                   | -15                       | 0                                            | -41                           | -12                               | 0                                                    |
| 16 | 30              | 46              | 150             | -4                    | 14                        | 18                                           | -9                            | 11                                | 20                                                   |
| 17 | 8               | 10              | 63              | -14                   | -20                       | -6                                           | -60                           | -24                               | -11                                                  |
| 18 | 33              | 36              | 143             | 10                    | 31                        | 21                                           | 39                            | 28                                | 25                                                   |

**Table S14.** Calculated  $\Delta g$ -values (ppt),  $\Delta g^{\text{calc}} = (g^{\text{calc}} - g_e) \cdot 1000$  with  $g_e = 2.0023$ , obtained with the  $\omega\text{B2GP-PLYP}$  functional, differences (D),  $D(\Delta g) = \Delta g^{\text{calc}} - \Delta g^{\text{exp}}$ , and percent differences (PD),  $\text{PD}(\Delta g) = \frac{\Delta g^{\text{calc}} - \Delta g^{\text{exp}}}{\Delta g^{\text{exp}}} \cdot 100$ , from the experimental values of the  $\Delta g$  parameter for the set of 18 Cu(II) complexes.

|    | $\Delta g_{xx}$ | $\Delta g_{yy}$ | $\Delta g_{zz}$ | $D(\Delta g_{\perp})$ | $D(\Delta g_{\parallel})$ | $D(\Delta g_{\parallel} - \Delta g_{\perp})$ | $\text{PD}(\Delta g_{\perp})$ | $\text{PD}(\Delta g_{\parallel})$ | $\text{PD}(\Delta g_{\parallel} - \Delta g_{\perp})$ |
|----|-----------------|-----------------|-----------------|-----------------------|---------------------------|----------------------------------------------|-------------------------------|-----------------------------------|------------------------------------------------------|
| 1  | 54              | 54              | 233             | 10                    | -6                        | -15                                          | 21                            | -2                                | -8                                                   |
| 2  | 51              | 51              | 227             | 0                     | -33                       | -34                                          | 1                             | -13                               | -16                                                  |
| 3  | 54              | 55              | 241             | 10                    | -18                       | -28                                          | 21                            | -7                                | -13                                                  |
| 4  | 47              | 47              | 201             | 9                     | -1                        | -10                                          | 22                            | -1                                | -6                                                   |
| 5  | 40              | 65              | 220             | 3                     | -45                       | -47                                          | 6                             | -17                               | -22                                                  |
| 6  | 46              | 67              | 226             | 7                     | 26                        | 19                                           | 14                            | 13                                | 13                                                   |
| 7  | 48              | 59              | 215             | 6                     | -22                       | -28                                          | 12                            | -9                                | -15                                                  |
| 8  | 55              | 57              | 227             | 5                     | -23                       | -28                                          | 9                             | -9                                | -14                                                  |
| 9  | 67              | 73              | 272             | 10                    | 20                        | 9                                            | 17                            | 8                                 | 5                                                    |
| 10 | 63              | 65              | 274             | 6                     | -9                        | -15                                          | 11                            | -3                                | -7                                                   |
| 11 | 33              | 62              | 213             | 0                     | 10                        | 10                                           | 0                             | 5                                 | 7                                                    |
| 12 | 54              | 62              | 227             | 4                     | 63                        | 58                                           | 8                             | 38                                | 53                                                   |
| 13 | 54              | 54              | 233             | 14                    | 32                        | 18                                           | 35                            | 16                                | 11                                                   |
| 14 | 34              | 64              | 196             | -8                    | 84                        | 92                                           | -15                           | 75                                | 169                                                  |
| 15 | 33              | 34              | 154             | -3                    | 30                        | 34                                           | -9                            | 24                                | 39                                                   |
| 16 | 36              | 53              | 193             | 3                     | 57                        | 55                                           | 6                             | 42                                | 58                                                   |
| 17 | 15              | 15              | 95              | -8                    | 13                        | 20                                           | -34                           | 15                                | 34                                                   |
| 18 | 47              | 49              | 195             | 23                    | 83                        | 59                                           | 95                            | 74                                | 68                                                   |

**Table S15.** Calculated  $\Delta g$ -values (ppt),  $\Delta g^{\text{calc}} = (g^{\text{calc}} - g_e) \cdot 1000$  with  $g_e = 2.0023$ , obtained with the **RSX-QIDH** functional, differences (D),  $D(\Delta g) = \Delta g^{\text{calc}} - \Delta g^{\text{exp}}$ , and percent differences (PD),  $PD(\Delta g) = \frac{\Delta g^{\text{calc}} - \Delta g^{\text{exp}}}{\Delta g^{\text{exp}}} \cdot 100$ , from the experimental values of the  $\Delta g$  parameter for the set of 18 Cu(II) complexes.

|    | $\Delta g_{xx}$ | $\Delta g_{yy}$ | $\Delta g_{zz}$ | $D(\Delta g_{\perp})$ | $D(\Delta g_{\parallel})$ | $D(\Delta g_{\parallel} - \Delta g_{\perp})$ | $PD(\Delta g_{\perp})$ | $PD(\Delta g_{\parallel})$ | $PD(\Delta g_{\parallel} - \Delta g_{\perp})$ |
|----|-----------------|-----------------|-----------------|-----------------------|---------------------------|----------------------------------------------|------------------------|----------------------------|-----------------------------------------------|
| 1  | 61              | 61              | 264             | 16                    | 26                        | 10                                           | 36                     | 11                         | 5                                             |
| 2  | 57              | 57              | 259             | 7                     | -1                        | -8                                           | 13                     | 0                          | -4                                            |
| 3  | 60              | 61              | 272             | 16                    | 12                        | -4                                           | 35                     | 5                          | -2                                            |
| 4  | 54              | 54              | 233             | 15                    | 30                        | 15                                           | 39                     | 15                         | 9                                             |
| 5  | 43              | 73              | 247             | 9                     | -17                       | -26                                          | 17                     | -7                         | -12                                           |
| 6  | 50              | 75              | 263             | 13                    | 64                        | 50                                           | 27                     | 32                         | 34                                            |
| 7  | 53              | 65              | 240             | 11                    | 3                         | -8                                           | 23                     | 1                          | -4                                            |
| 8  | 61              | 63              | 255             | 11                    | 5                         | -6                                           | 21                     | 2                          | -3                                            |
| 9  | 74              | 80              | 305             | 18                    | 53                        | 35                                           | 30                     | 21                         | 18                                            |
| 10 | 69              | 70              | 305             | 12                    | 22                        | 10                                           | 21                     | 8                          | 4                                             |
| 11 | 39              | 75              | 246             | 10                    | 43                        | 34                                           | 20                     | 21                         | 22                                            |
| 12 | 62              | 71              | 262             | 13                    | 97                        | 84                                           | 24                     | 59                         | 76                                            |
| 13 | 46              | 108             | 308             | 36                    | 107                       | 71                                           | 91                     | 53                         | 44                                            |
| 14 | 39              | 83              | 239             | 4                     | 128                       | 124                                          | 7                      | 114                        | 227                                           |
| 15 | 47              | 49              | 207             | 11                    | 83                        | 72                                           | 31                     | 67                         | 83                                            |
| 16 | 45              | 66              | 235             | 14                    | 100                       | 86                                           | 32                     | 74                         | 92                                            |
| 17 | 29              | 29              | 146             | 6                     | 64                        | 57                                           | 28                     | 77                         | 96                                            |
| 18 | 64              | 66              | 254             | 41                    | 142                       | 101                                          | 165                    | 127                        | 116                                           |



**Table S16.** Calculated  $\Delta g$ -values (ppt),  $\Delta g^{\text{calc}} = (g^{\text{calc}} - g_e) \cdot 1000$  with  $g_e = 2.0023$ , obtained with the **RSX-0DH** functional, differences (D),  $D(\Delta g) = \Delta g^{\text{calc}} - \Delta g^{\text{exp}}$ , and percent differences (PD),  $PD(\Delta g) = \frac{\Delta g^{\text{calc}} - \Delta g^{\text{exp}}}{\Delta g^{\text{exp}}} \cdot 100$ , from the experimental values of the  $\Delta g$  parameter for the set of 18 Cu(II) complexes.

|    | $\Delta g_{xx}$ | $\Delta g_{yy}$ | $\Delta g_{zz}$ | $D(\Delta g_{\perp})$ | $D(\Delta g_{\parallel})$ | $D(\Delta g_{\parallel} - \Delta g_{\perp})$ | $PD(\Delta g_{\perp})$ | $PD(\Delta g_{\parallel})$ | $PD(\Delta g_{\parallel} - \Delta g_{\perp})$ |
|----|-----------------|-----------------|-----------------|-----------------------|---------------------------|----------------------------------------------|------------------------|----------------------------|-----------------------------------------------|
| 1  | 60              | 60              | 240             | 15                    | 1                         | -14                                          | 34                     | 1                          | -7                                            |
| 2  | 57              | 57              | 235             | 6                     | -25                       | -31                                          | 12                     | -10                        | -15                                           |
| 3  | 59              | 60              | 246             | 15                    | -14                       | -28                                          | 33                     | -5                         | -13                                           |
| 4  | 54              | 54              | 214             | 15                    | 11                        | -4                                           | 39                     | 6                          | -2                                            |
| 5  | 42              | 73              | 226             | 8                     | -39                       | -47                                          | 16                     | -15                        | -22                                           |
| 6  | 51              | 72              | 227             | 12                    | 27                        | 16                                           | 24                     | 14                         | 10                                            |
| 7  | 52              | 63              | 220             | 10                    | -18                       | -28                                          | 21                     | -8                         | -15                                           |
| 8  | 60              | 62              | 232             | 10                    | -19                       | -29                                          | 19                     | -8                         | -14                                           |
| 9  | 73              | 78              | 272             | 16                    | 20                        | 4                                            | 27                     | 8                          | 2                                             |
| 10 | 68              | 69              | 272             | 11                    | -11                       | -21                                          | 18                     | -4                         | -9                                            |
| 11 | 38              | 75              | 219             | 9                     | 16                        | 7                                            | 18                     | 8                          | 5                                             |
| 12 | 59              | 70              | 234             | 11                    | 69                        | 59                                           | 20                     | 42                         | 53                                            |
| 13 | 43              | 102             | 267             | 32                    | 66                        | 34                                           | 81                     | 33                         | 21                                            |
| 14 | 41              | 74              | 206             | 0                     | 94                        | 94                                           | 0                      | 84                         | 172                                           |
| 15 | 47              | 47              | 185             | 10                    | 61                        | 50                                           | 28                     | 49                         | 58                                            |
| 16 | 45              | 66              | 201             | 14                    | 65                        | 51                                           | 33                     | 48                         | 55                                            |
| 17 | 33              | 34              | 142             | 11                    | 59                        | 48                                           | 50                     | 72                         | 80                                            |
| 18 | 62              | 64              | 221             | 39                    | 110                       | 71                                           | 156                    | 98                         | 82                                            |

**Table S17.** Calculated  $\Delta g$ -values (ppt),  $\Delta g^{\text{calc}} = (g^{\text{calc}} - g_e) \cdot 1000$  with  $g_e = 2.0023$ , obtained with the  $\omega\text{B88PP86}$  functional, differences (D),  $D(\Delta g) = \Delta g^{\text{calc}} - \Delta g^{\text{exp}}$ , and percent differences (PD),  $\text{PD}(\Delta g) = \frac{\Delta g^{\text{calc}} - \Delta g^{\text{exp}}}{\Delta g^{\text{exp}}} \cdot 100$ , from the experimental values of the  $\Delta g$  parameter for the set of 18 Cu(II) complexes.

|    | $\Delta g_{xx}$ | $\Delta g_{yy}$ | $\Delta g_{zz}$ | $D(\Delta g_{\perp})$ | $D(\Delta g_{\parallel})$ | $D(\Delta g_{\parallel} - \Delta g_{\perp})$ | $\text{PD}(\Delta g_{\perp})$ | $\text{PD}(\Delta g_{\parallel})$ | $\text{PD}(\Delta g_{\parallel} - \Delta g_{\perp})$ |
|----|-----------------|-----------------|-----------------|-----------------------|---------------------------|----------------------------------------------|-------------------------------|-----------------------------------|------------------------------------------------------|
| 1  | 49              | 49              | 213             | 4                     | -26                       | -30                                          | 9                             | -11                               | -15                                                  |
| 2  | 46              | 46              | 207             | -5                    | -53                       | -49                                          | -9                            | -21                               | -23                                                  |
| 3  | 49              | 50              | 224             | 5                     | -36                       | -41                                          | 11                            | -14                               | -19                                                  |
| 4  | 41              | 42              | 179             | 3                     | -24                       | -26                                          | 7                             | -12                               | -16                                                  |
| 5  | 37              | 58              | 202             | -2                    | -62                       | -60                                          | -4                            | -24                               | -28                                                  |
| 6  | 42              | 61              | 211             | 2                     | 11                        | 9                                            | 4                             | 6                                 | 6                                                    |
| 7  | 43              | 54              | 199             | 1                     | -39                       | -40                                          | 2                             | -16                               | -21                                                  |
| 8  | 50              | 52              | 209             | 0                     | -42                       | -41                                          | 0                             | -17                               | -21                                                  |
| 9  | 62              | 67              | 253             | 5                     | 1                         | -3                                           | 8                             | 1                                 | -2                                                   |
| 10 | 59              | 60              | 258             | 2                     | -25                       | -27                                          | 3                             | -9                                | -12                                                  |
| 11 | 29              | 51              | 190             | -8                    | -12                       | -4                                           | -16                           | -6                                | -3                                                   |
| 12 | 47              | 55              | 206             | -2                    | 41                        | 43                                           | -5                            | 25                                | 39                                                   |
| 13 | 37              | 83              | 241             | 20                    | 41                        | 21                                           | 49                            | 20                                | 13                                                   |
| 14 | 27              | 54              | 172             | -16                   | 60                        | 76                                           | -29                           | 54                                | 140                                                  |
| 15 | 20              | 23              | 114             | -16                   | -10                       | 6                                            | -42                           | -8                                | 7                                                    |
| 16 | 28              | 42              | 172             | -6                    | 36                        | 43                                           | -15                           | 27                                | 46                                                   |
| 17 | 1               | 2               | 49              | -21                   | -34                       | -13                                          | -95                           | -41                               | -21                                                  |
| 18 | 33              | 36              | 154             | 10                    | 42                        | 33                                           | 40                            | 38                                | 37                                                   |

**Table S18.** Calculated  $\Delta g$ -values (ppt),  $\Delta g^{\text{calc}} = (g^{\text{calc}} - g_e) \cdot 1000$  with  $g_e = 2.0023$ , obtained with the  $\omega\text{PBEPP86}$  functional, differences (D),  $D(\Delta g) = \Delta g^{\text{calc}} - \Delta g^{\text{exp}}$ , and percent differences (PD),  $\text{PD}(\Delta g) = \frac{\Delta g^{\text{calc}} - \Delta g^{\text{exp}}}{\Delta g^{\text{exp}}} \cdot 100$ , from the experimental values of the  $\Delta g$  parameter for the set of 18 Cu(II) complexes.

|    | $\Delta g_{xx}$ | $\Delta g_{yy}$ | $\Delta g_{zz}$ | $D(\Delta g_{\perp})$ | $D(\Delta g_{\parallel})$ | $D(\Delta g_{\parallel} - \Delta g_{\perp})$ | $\text{PD}(\Delta g_{\perp})$ | $\text{PD}(\Delta g_{\parallel})$ | $\text{PD}(\Delta g_{\parallel} - \Delta g_{\perp})$ |
|----|-----------------|-----------------|-----------------|-----------------------|---------------------------|----------------------------------------------|-------------------------------|-----------------------------------|------------------------------------------------------|
| 1  | 51              | 51              | 227             | 6                     | -12                       | -18                                          | 13                            | -5                                | -9                                                   |
| 2  | 48              | 48              | 222             | -3                    | -39                       | -36                                          | -5                            | -15                               | -17                                                  |
| 3  | 51              | 52              | 239             | 7                     | -21                       | -28                                          | 15                            | -8                                | -13                                                  |
| 4  | 43              | 44              | 191             | 5                     | -11                       | -16                                          | 12                            | -6                                | -10                                                  |
| 5  | 38              | 61              | 215             | 0                     | -49                       | -49                                          | 0                             | -19                               | -23                                                  |
| 6  | 44              | 65              | 230             | 5                     | 30                        | 26                                           | 9                             | 15                                | 17                                                   |
| 7  | 45              | 56              | 211             | 3                     | -27                       | -30                                          | 6                             | -11                               | -16                                                  |
| 8  | 52              | 54              | 223             | 2                     | -27                       | -29                                          | 4                             | -11                               | -15                                                  |
| 9  | 65              | 70              | 272             | 8                     | 21                        | 13                                           | 13                            | 8                                 | 7                                                    |
| 10 | 61              | 63              | 276             | 4                     | -6                        | -11                                          | 7                             | -2                                | -5                                                   |
| 11 | 31              | 54              | 206             | -5                    | 4                         | 8                                            | -10                           | 2                                 | 5                                                    |
| 12 | 50              | 58              | 222             | 1                     | 57                        | 57                                           | 1                             | 35                                | 51                                                   |
| 13 | 39              | 89              | 265             | 24                    | 64                        | 40                                           | 60                            | 32                                | 25                                                   |
| 14 | 28              | 63              | 192             | -12                   | 80                        | 92                                           | -21                           | 72                                | 169                                                  |
| 15 | 24              | 26              | 131             | -11                   | 8                         | 19                                           | -31                           | 6                                 | 22                                                   |
| 16 | 30              | 45              | 196             | -4                    | 60                        | 64                                           | -10                           | 44                                | 68                                                   |
| 17 | 3               | 3               | 59              | -20                   | -24                       | -4                                           | -88                           | -29                               | -6                                                   |
| 18 | 39              | 41              | 176             | 15                    | 65                        | 50                                           | 61                            | 58                                | 57                                                   |

**Table S19.** Calculated  $\Delta g$ -values (ppt),  $\Delta g^{\text{calc}} = (g^{\text{calc}} - g_e) \cdot 1000$  with  $g_e = 2.0023$ , obtained with the  $\omega\text{B97X-2}$  functional, differences (D),  $D(\Delta g) = \Delta g^{\text{calc}} - \Delta g^{\text{exp}}$ , and percent differences (PD),  $\text{PD}(\Delta g) = \frac{\Delta g^{\text{calc}} - \Delta g^{\text{exp}}}{\Delta g^{\text{exp}}} \cdot 100$ , from the experimental values of the  $\Delta g$  parameter for the set of 18 Cu(II) complexes.

|    | $\Delta g_{xx}$ | $\Delta g_{yy}$ | $\Delta g_{zz}$ | $D(\Delta g_{\perp})$ | $D(\Delta g_{\parallel})$ | $D(\Delta g_{\parallel} - \Delta g_{\perp})$ | $\text{PD}(\Delta g_{\perp})$ | $\text{PD}(\Delta g_{\parallel})$ | $\text{PD}(\Delta g_{\parallel} - \Delta g_{\perp})$ |
|----|-----------------|-----------------|-----------------|-----------------------|---------------------------|----------------------------------------------|-------------------------------|-----------------------------------|------------------------------------------------------|
| 1  | 47              | 47              | 199             | 2                     | -40                       | -41                                          | 4                             | -17                               | -21                                                  |
| 2  | 44              | 44              | 194             | -7                    | -67                       | -60                                          | -13                           | -26                               | -28                                                  |
| 3  | 46              | 47              | 207             | 2                     | -53                       | -55                                          | 4                             | -20                               | -26                                                  |
| 4  | 40              | 40              | 170             | 1                     | -33                       | -34                                          | 3                             | -16                               | -21                                                  |
| 5  | 35              | 55              | 189             | -4                    | -76                       | -72                                          | -9                            | -29                               | -33                                                  |
| 6  | 35              | 55              | 189             | -4                    | -11                       | -7                                           | -9                            | -6                                | -4                                                   |
| 7  | 40              | 52              | 185             | -1                    | -53                       | -51                                          | -3                            | -22                               | -27                                                  |
| 8  | 47              | 49              | 194             | -3                    | -56                       | -53                                          | -6                            | -22                               | -27                                                  |
| 9  | 57              | 63              | 232             | 1                     | -20                       | -20                                          | 1                             | -8                                | -11                                                  |
| 10 | 55              | 57              | 237             | -2                    | -46                       | -44                                          | -3                            | -16                               | -20                                                  |
| 11 | 28              | 48              | 183             | -10                   | -19                       | -10                                          | -20                           | -10                               | -6                                                   |
| 12 | 47              | 55              | 196             | -2                    | 31                        | 33                                           | -5                            | 19                                | 30                                                   |
| 13 | 36              | 78              | 226             | 17                    | 25                        | 8                                            | 42                            | 12                                | 5                                                    |
| 14 | 27              | 53              | 166             | -18                   | 54                        | 72                                           | -31                           | 49                                | 132                                                  |
| 15 | 24              | 26              | 125             | -12                   | 2                         | 14                                           | -33                           | 1                                 | 16                                                   |
| 16 | 27              | 41              | 167             | -8                    | 31                        | 39                                           | -18                           | 23                                | 42                                                   |
| 17 | 5               | 6               | 67              | -17                   | -15                       | 2                                            | -76                           | -19                               | 3                                                    |
| 18 | 36              | 40              | 161             | 13                    | 49                        | 36                                           | 54                            | 44                                | 42                                                   |

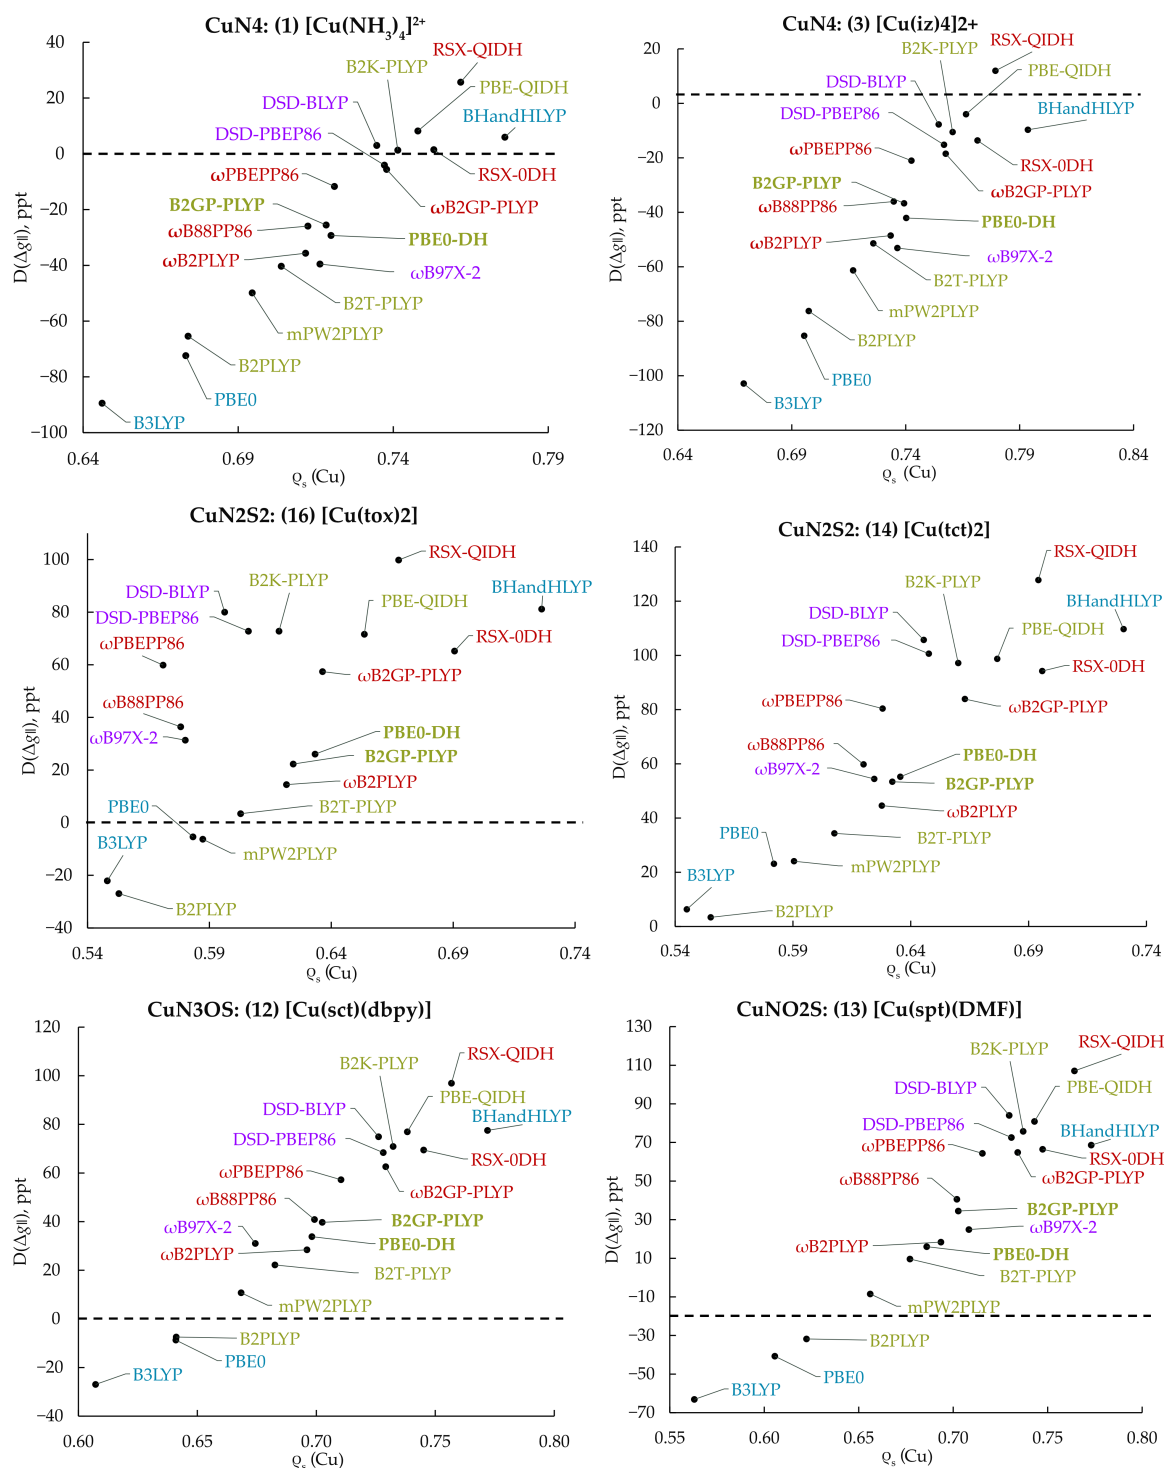

**Figure S1.** Correlation of the differences,  $D(\Delta g_{||})$ , of the calculated  $g$ -tensor from the experimental value of the parallel  $g$ -shift with the Cu spin populations computed with the respective functional for pairs of complexes with the same copper-coordinating atoms 1 and 3, 16 and 14, and with similar coordination spheres 12 and 13.

## Cu(II) Complexes Set Optimized Structures Coordinates

### (1) [Cu(NH<sub>3</sub>)<sub>4</sub>]<sup>2+</sup>

|    |                   |                   |                   |
|----|-------------------|-------------------|-------------------|
| Cu | 0.00006419199069  | -0.00003340568689 | -0.00022217666782 |
| N  | 2.06848435125770  | 0.00010161567862  | 0.00708711104760  |
| H  | 2.50353403337608  | 0.92206255017040  | 0.01099143938875  |
| H  | 2.45240522847896  | -0.47709423764054 | -0.81022241731436 |
| H  | 2.44658665114581  | -0.48121730588988 | 0.82470182355239  |
| N  | 0.00017210694298  | -2.06817901727768 | -0.00703110959095 |
| H  | -0.48015601721747 | -2.44633662488226 | -0.82520902101680 |
| H  | -0.47799488839448 | -2.45211469025323 | 0.80970371809922  |
| H  | 0.92214716018829  | -2.50321055717668 | -0.00976606755074 |
| N  | -2.06837744747900 | -0.00016232631948 | 0.00624217373816  |
| H  | -2.50344437695778 | -0.92211693127714 | 0.00954348028378  |
| H  | -2.44672945419513 | 0.48078282865023  | 0.82396108289575  |
| H  | -2.45201109269431 | 0.47742545237280  | -0.81097179352883 |
| N  | -0.00006737492988 | 2.06811092911312  | -0.00647668527445 |
| H  | 0.47703143664634  | 2.45152402711104  | 0.81113155825011  |
| H  | 0.48134416636775  | 2.44676757465875  | -0.82378269324413 |
| H  | -0.92202980552656 | 2.50316146164882  | -0.01020316506768 |

### (2) [Cu(py)<sub>4</sub>]<sup>2+</sup>

|    |                   |                   |                   |
|----|-------------------|-------------------|-------------------|
| Cu | 0.00064871054963  | 0.00055364112791  | 0.00050606191850  |
| C  | -0.62613643534546 | 2.72806230228956  | -0.97103874156407 |
| H  | -1.13178451821264 | 2.14924080657570  | -1.73273223452910 |
| C  | 0.62818267485747  | 2.72758620736162  | 0.97276422793275  |
| H  | 1.13364097332214  | 2.14838220946754  | 1.73429918701266  |
| C  | 0.64123351269850  | 4.11093425742313  | 1.01169666841525  |
| H  | 1.14953662101276  | 4.61842213520206  | 1.82019832789757  |
| C  | 0.00135448999117  | 4.81853946698848  | 0.00116573001538  |
| H  | 0.00152630808858  | 5.90098619691840  | 0.00131965963620  |
| C  | -0.63874980131543 | 4.11142514703775  | -1.00956934786879 |
| H  | -1.14690250461267 | 4.61931487040205  | -1.81791361997104 |
| C  | -2.72807753920898 | 0.63013558657336  | 0.96724950210857  |
| H  | -2.15014264586219 | 1.13757250817281  | 1.72843670121082  |
| C  | -4.11148738924266 | 0.64295921532839  | 1.00403531132701  |
| H  | -4.62033008779108 | 1.15309403121932  | 1.81052980822897  |
| C  | -4.81740493525664 | 0.00048235765528  | -0.00602959798156 |
| H  | -5.89985057163160 | 0.00040174957786  | -0.00752359769460 |
| C  | -4.10860600491109 | -0.64187905025481 | -1.01414993726496 |
| H  | -4.61514144278381 | -1.15210049855616 | -1.82204068340216 |
| C  | -2.72530638231224 | -0.62882491836117 | -0.97354869349491 |
| H  | -2.14520411208653 | -1.13617224650530 | -1.73314650006357 |
| N  | 0.00091960930853  | 2.04128785468445  | 0.00076351423442  |
| N  | -2.04016214797721 | 0.00072076451285  | -0.00220886350020 |
| C  | 2.72804538074231  | -0.62599434107569 | 0.97257489215159  |
| H  | 2.14913292406489  | -1.13084460159194 | 1.73472380818393  |
| C  | 2.72780200978536  | 0.62665390869062  | -0.97230567545531 |
| H  | 2.14869535762960  | 1.13156800801700  | -1.73426806791342 |
| C  | 4.11115243388362  | 0.63938898424997  | -1.01126768153252 |

|   |                   |                   |                   |
|---|-------------------|-------------------|-------------------|
| H | 4.61873458495279  | 1.14689252009011  | -1.82021232820699 |
| C | 4.81863864730132  | 0.00024276258519  | -0.00019006052434 |
| H | 5.90108551884253  | 0.00018120744390  | -0.00036375969983 |
| C | 4.11140580814979  | -0.63883415982520 | 1.01111066875217  |
| H | 4.61920200811367  | -1.14636351252084 | 1.81990495893397  |
| C | 0.62869926131348  | -2.72786818960170 | -0.96803617311464 |
| H | 1.13559972283275  | -2.14969708092376 | -1.72939426660448 |
| C | 0.64114285707334  | -4.11126349030151 | -1.00550068567399 |
| H | 1.15044166234404  | -4.61984591471691 | -1.81268736268536 |
| C | -0.00063425114495 | -4.81750559454211 | 0.00478212580682  |
| H | -0.00101487598637 | -5.89995188341259 | 0.00573807367462  |
| C | -0.64194931238644 | -4.10903073186325 | 1.01379433144445  |
| H | -1.15159424864755 | -4.61582760836235 | 1.82188473664532  |
| C | -0.62860376070508 | -2.72571504053564 | 0.97383708995082  |
| H | -1.13515589465627 | -2.14585494837692 | 1.73414521786001  |
| N | 2.04138437161123  | 0.00034420966912  | 0.00022850067436  |
| N | 0.00029577160737  | -2.04025841793653 | 0.00229805572963  |

**(3) [Cu(iz)<sub>4</sub>]<sup>2+</sup>**

|    |                   |                   |                   |
|----|-------------------|-------------------|-------------------|
| Cu | 0.00063373514287  | 0.00013749392920  | 0.00114343311217  |
| N  | -0.00427530592122 | 1.99919361218418  | -0.27698133854338 |
| N  | 0.01865980908615  | -2.01295892584394 | -0.14380293020921 |
| N  | -2.01228972261443 | -0.00051184532441 | 0.14898754124251  |
| N  | 1.99989197733047  | 0.01418829883767  | 0.27745970449316  |
| C  | -0.65858239570237 | 2.65129063737698  | -1.22925220236971 |
| N  | -0.43762124311890 | 3.97021073912689  | -1.11317233133061 |
| C  | 0.38857194760509  | 4.18553167969414  | -0.03673566506116 |
| C  | 0.65521071012798  | 2.95348178289080  | 0.47639517177857  |
| C  | 0.73142930699296  | -2.72594659168801 | -1.00620452900947 |
| N  | 0.49980019651869  | -4.03455667244719 | -0.81716391579167 |
| C  | -0.39497873279143 | -4.17904671725604 | 0.21539985105194  |
| C  | -0.69084079970746 | -2.91598228925233 | 0.62708074798455  |
| H  | -1.28097077290903 | 2.21321308089280  | -1.99103192926683 |
| H  | -0.81119610330821 | 4.68230883668093  | -1.72387329846054 |
| H  | 0.70519545631364  | 5.16909584943211  | 0.26307328023964  |
| H  | 1.26841741205636  | 2.69573701167392  | 1.32118319085299  |
| H  | 1.40305578469015  | -2.33859500524890 | -1.75350611322401 |
| H  | 0.91013035155573  | -4.78515154266637 | -1.35366829190548 |
| H  | -0.73308460369568 | -5.14096948944240 | 0.55881003465167  |
| H  | -1.35669603590650 | -2.60345066714186 | 1.41135902372309  |
| C  | -2.73065193250235 | 0.70600570371529  | 1.01207219964728  |
| C  | -2.90977385172835 | -0.71835975921136 | -0.62062293257349 |
| C  | 2.65901946254755  | -0.63352826802659 | 1.22939594916818  |
| C  | 2.94728650172290  | 0.68148556717359  | -0.47772219074114 |
| N  | -4.03735449670527 | 0.46269833141679  | 0.82448465491760  |
| H  | -2.34848235288431 | 1.38116665252699  | 1.75885660537031  |
| C  | -4.17499231007573 | -0.43350489121345 | -0.20777555540587 |
| H  | -2.59215332145409 | -1.38170975391346 | -1.40498496642145 |
| N  | 3.97578087188399  | -0.40100658691058 | 1.11134935270394  |
| H  | 2.22747407100055  | -1.25905641836600 | 1.99233123994806  |

|   |                   |                   |                   |
|---|-------------------|-------------------|-------------------|
| C | 4.18235610660086  | 0.42601429745266  | 0.03383743526066  |
| H | 2.68298198509846  | 1.29175227017497  | -1.32261586402748 |
| H | -4.79099476342635 | 0.86642833340329  | 1.36172735154627  |
| H | -5.13423919265935 | -0.78022421978456 | -0.55008133554670 |
| H | 4.69196456993924  | -0.76765929925224 | 1.72146831108205  |
| H | 5.16268651389740  | 0.75099865940646  | -0.26761315988643 |

**(4) [Cu(en)<sub>2</sub>]<sup>2+</sup>**

|    |                   |                   |                   |
|----|-------------------|-------------------|-------------------|
| Cu | -0.00015331540197 | -0.00014261966126 | 0.00130599187129  |
| N  | 0.01888040826412  | -2.05628794825318 | -0.01285107026608 |
| H  | -0.23364899140073 | -2.40061267060284 | 0.91432221304464  |
| H  | -0.65965637545835 | -2.47127917104865 | -0.64897001809117 |
| N  | 2.04553447125029  | -0.20826572185295 | -0.00625176921902 |
| H  | 2.40374790944715  | 0.02580068847256  | -0.93298215161064 |
| H  | 2.52519827322676  | 0.42058511059595  | 0.63540668422816  |
| C  | 1.39505586446807  | -2.53178094991821 | -0.36465489149023 |
| H  | 1.49739693819759  | -2.47730900918716 | -1.44961838531218 |
| H  | 1.53700790937467  | -3.57143567702613 | -0.06750913289078 |
| C  | 2.39678148529083  | -1.62686650652761 | 0.32196070889380  |
| H  | 2.34694662725292  | -1.73851045698825 | 1.40621478410602  |
| H  | 3.41510357465003  | -1.85960107679818 | 0.00865494288315  |
| N  | -0.01919000581116 | 2.05602044834685  | 0.01290199998721  |
| H  | 0.23383413033624  | 2.39915266058683  | -0.91458674460682 |
| H  | 0.65898770922794  | 2.47184315698049  | 0.64885771947717  |
| C  | -1.39556588059462 | 2.53190360429073  | 0.36334469067398  |
| H  | -1.49864731253624 | 2.47850101015915  | 1.44828688795324  |
| H  | -1.53728844189629 | 3.57125784446652  | 0.06506528340386  |
| C  | -2.39680511854110 | 1.62633974433174  | -0.32312636704419 |
| N  | -2.04584339296127 | 0.20801195237866  | 0.00661047752892  |
| H  | -2.40489633586304 | -0.02525702094040 | 0.93321141576271  |
| H  | -2.52495131025669 | -0.42138346403964 | -0.63493235170172 |
| H  | -2.34614767184780 | 1.73698410678809  | -1.40744982870310 |
| H  | -3.41537052641735 | 1.85938416744688  | -0.01081958887825 |

**(5) [Cu(gly)<sub>2</sub>]**

|    |                   |                   |                   |
|----|-------------------|-------------------|-------------------|
| Cu | -0.00019902689836 | -0.00010991606501 | 0.00191697959717  |
| O  | 0.00065892132777  | -1.89504463421948 | -0.02051506672269 |
| N  | -2.02935875839704 | -0.16156062390687 | 0.00502268995214  |
| C  | -2.36892449399920 | -1.57274546218537 | -0.30321393112278 |
| H  | -2.34801406721589 | 0.11132733926863  | 0.92911222810248  |
| O  | -1.31580256064245 | -3.70054325751094 | -0.17488430622873 |
| C  | -1.14632360979321 | -2.50181168212180 | -0.14593162692259 |
| H  | -2.43476450549415 | 0.50110715023905  | -0.64713762439425 |
| H  | -3.17951821204974 | -1.94113338232926 | 0.32417713660353  |
| O  | -0.00107175784885 | 1.89491111406006  | 0.02476987750451  |
| N  | 2.02893185094753  | 0.16166670863894  | -0.00087680127971 |
| C  | 1.14579235814648  | 2.50150211946395  | 0.15223682727138  |
| C  | 2.36782796434397  | 1.57205095214539  | 0.31157152941100  |



|   |                   |                   |                   |
|---|-------------------|-------------------|-------------------|
| H | 2.34739605677431  | -0.10794540528992 | -0.92600380998595 |
| H | 2.43497929700576  | -0.50287189174769 | 0.64898472639066  |
| O | 1.31534250123555  | 3.70019499990915  | 0.18227399960844  |
| H | 3.18077653631439  | 1.94178541614900  | -0.31196741654389 |
| H | 2.69352291419467  | 1.63866775558675  | 1.35003239510448  |
| H | -2.69847230895154 | -1.64197472908456 | -1.34026899434521 |

**(6) [Cu(ox)<sub>2</sub>]**

|    |                   |                   |                   |
|----|-------------------|-------------------|-------------------|
| Cu | -0.00000801612025 | -0.00002405653605 | -0.00018206991628 |
| O  | -0.02117161329831 | 1.93627776959757  | -0.00194450121767 |
| N  | -1.97981024889942 | 0.17550198270883  | -0.00118671072030 |
| C  | -2.90397404828866 | -0.76533308000362 | -0.00069579709856 |
| C  | -4.27185371721407 | -0.44293313893140 | -0.00188712928896 |
| C  | -4.65764361664131 | 0.87658727326228  | -0.00366561283899 |
| C  | -3.68781317371574 | 1.90441208068080  | -0.00426619573580 |
| C  | -3.96422629820857 | 3.28979277497971  | -0.00615066250969 |
| C  | -2.91213933949776 | 4.17955037191731  | -0.00659498641498 |
| C  | -1.56732614185677 | 3.76707929126945  | -0.00522179574968 |
| C  | -1.23943998089412 | 2.41518829054763  | -0.00327833519467 |
| C  | -2.33236062465255 | 1.48773475961889  | -0.00286702783323 |
| H  | -2.54839235883358 | -1.78795458415159 | 0.00063119546867  |
| H  | -5.00327512061875 | -1.23974913657229 | -0.00141410170342 |
| H  | -5.70923134115544 | 1.14006743980086  | -0.00464764525228 |
| H  | -4.99000582272723 | 3.63500007156538  | -0.00724443183030 |
| H  | -3.12183828988028 | 5.24298697874960  | -0.00807241743295 |
| H  | -0.77039575598177 | 4.49954272031364  | -0.00563986216237 |
| O  | 0.02115283708314  | -1.93632767045601 | 0.00157351879941  |
| N  | 1.97979225955900  | -0.17555469920370 | 0.00083042030685  |
| C  | 1.23942031691348  | -2.41524007073008 | 0.00292507135939  |
| C  | 2.90395701046036  | 0.76527990172865  | 0.00033919722634  |
| C  | 2.33234180431108  | -1.48778745717406 | 0.00251982326454  |
| C  | 1.56730537979381  | -3.76713131874267 | 0.00489224773972  |
| C  | 4.27183620261543  | 0.44287916196174  | 0.00154155011244  |
| H  | 2.54837549457160  | 1.78790147685948  | -0.00099446898386 |
| C  | 3.68779414807796  | -1.90446571131034 | 0.00393775080116  |
| C  | 2.91211836828423  | -4.17960328671864 | 0.00628668840439  |
| H  | 0.77037462429662  | -4.49959429294586 | 0.00530683404630  |
| C  | 4.65762530720293  | -0.87664152346814 | 0.00333522827837  |
| H  | 5.00325885949694  | 1.23969402835115  | 0.00106646911722  |
| C  | 3.96420613704625  | -3.28984672901765 | 0.00584145572170  |
| H  | 3.12181668213735  | -5.24304000617309 | 0.00778125474489  |
| H  | 5.70921204624249  | -1.14012549507007 | 0.00432809738272  |
| H  | 4.98998551339191  | -3.63505439070773 | 0.00695379910987  |

**(7) [Cu(sac)<sub>2</sub>]**

|    |                   |                   |                   |
|----|-------------------|-------------------|-------------------|
| Cu | -0.00000316791655 | -0.00000293538656 | -0.00095429325206 |
| O  | -0.02234388292928 | 1.94074737339228  | -0.00116985550733 |
| C  | -1.04540595716471 | 2.73408791974294  | -0.00104717009544 |

|   |                   |                   |                   |
|---|-------------------|-------------------|-------------------|
| C | -2.41069190140790 | 2.29313309646638  | -0.00047478278778 |
| C | -3.45575349070688 | 3.24493958403794  | -0.00040434858539 |
| H | -4.47859661075680 | 2.88298289060394  | 0.00000885462044  |
| C | -3.20547539661539 | 4.59442163853088  | -0.00083572333995 |
| C | -1.86864861202310 | 5.03109417464890  | -0.00136405653210 |
| H | -1.65553025266125 | 6.09410712951882  | -0.00170240073282 |
| C | -0.82442588066406 | 4.13749309453469  | -0.00145683301341 |
| H | 0.20336878416319  | 4.47737994575792  | -0.00186396915290 |
| C | -2.76385572302839 | 0.91061519372130  | -0.00003120602274 |
| N | -1.93282720449472 | -0.07764826861816 | -0.00007233411027 |
| O | 0.02233781847774  | -1.94075313825274 | -0.00019523570603 |
| C | 1.04539986025716  | -2.73409334330351 | 0.00061002034657  |
| C | 2.41068568860077  | -2.29313824795311 | 0.00126756128986  |
| C | 3.45574716824698  | -3.24494441885955 | 0.00210419394759  |
| H | 4.47859015137646  | -2.88298744721533 | 0.00255730582456  |
| C | 3.20546914257534  | -4.59442646379640 | 0.00234956830655  |
| C | 1.86864255013118  | -5.03109928011670 | 0.00174808161270  |
| H | 1.65552426691203  | -6.09411228748074 | 0.00194037754829  |
| C | 0.82441995898270  | -4.13749848644412 | 0.00091997392235  |
| H | -0.20337454027480 | -4.47738575912318 | 0.00046278017002  |
| C | 2.76384928014775  | -0.91062027667018 | 0.00106440866770  |
| N | 1.93282067060372  | 0.07764274882707  | 0.00028865154031  |
| H | 2.34973810177148  | 1.00115238393758  | 0.00026303530863  |
| H | -2.34974482230651 | -1.00115776847171 | 0.00027450321319  |
| H | -3.83389336015788 | 0.69322238660675  | 0.00034020939313  |
| H | -4.01736900268455 | 5.30908751133508  | -0.00078908098711 |
| H | 4.01736270064112  | -5.30909211376502 | 0.00298774113960  |
| H | 3.83388679890514  | -0.69322713520545 | 0.00160043197385  |

**(8) [Cu(acac)(bpy)]<sup>+</sup>**

|    |                   |                  |                   |
|----|-------------------|------------------|-------------------|
| Cu | -3.88792387802829 | 4.00094717478966 | 14.31020874229040 |
| C  | -4.61332108315892 | 1.91953655177168 | 16.33200306037300 |
| H  | -4.28706828533027 | 1.25544990373674 | 15.54343942505772 |
| C  | -5.07506424046352 | 1.45380447264498 | 17.55403841838232 |
| H  | -5.11846206396952 | 0.39057525620617 | 17.74390175132518 |
| C  | -5.47280645924605 | 2.37802218121854 | 18.50905358841311 |
| H  | -5.83818511667751 | 2.05067308361509 | 19.47369109322342 |
| C  | -5.39835985703783 | 3.73367750812824 | 18.21752616017038 |
| H  | -5.70508497475895 | 4.46283106913968 | 18.95276413866581 |
| C  | -4.92615254724380 | 4.13393523460621 | 16.97327206350870 |
| C  | -4.79805115102216 | 5.54333034396589 | 16.54236157105507 |
| C  | -5.13605717219724 | 6.63852633829692 | 17.32842278727206 |
| H  | -5.52332546762982 | 6.50335876771276 | 18.32744813056300 |
| C  | -4.97006350074634 | 7.91762735751546 | 16.81399907457995 |
| H  | -5.22861518110196 | 8.78049182258739 | 17.41387180528742 |
| C  | -4.47175238157893 | 8.07505847620502 | 15.52897755424017 |
| H  | -4.32841975794579 | 9.05435582445068 | 15.09439832873821 |
| C  | -4.15497154954355 | 6.94055306205386 | 14.79679351701093 |
| H  | -3.76459120358575 | 6.99006340510197 | 13.78960842766539 |

|   |                   |                  |                   |
|---|-------------------|------------------|-------------------|
| C | -2.90040927961589 | 0.59358789923410 | 12.06498363229286 |
| H | -2.19280477050873 | 0.14971041530907 | 12.76895191529334 |
| H | -2.53538262865347 | 0.44634115517994 | 11.05142354876295 |
| H | -3.85050680238780 | 0.06865404982234 | 12.18555118179482 |
| C | -3.08709764067838 | 2.04616265738159 | 12.39771733973431 |
| C | -2.77795077817358 | 3.02686810793971 | 11.45288725130690 |
| H | -2.40993751813548 | 2.70014262623372 | 10.49272522423630 |
| C | -2.91043868946141 | 4.40068794636755 | 11.66415077106174 |
| C | -2.54580475523584 | 5.36990918463979 | 10.57641542677089 |
| H | -3.41465037425169 | 5.98587325486589 | 10.33410508283118 |
| H | -2.19978872934550 | 4.86843735705167 | 9.67587240574483  |
| H | -1.76309001055910 | 6.04104654012220 | 10.93711043778344 |
| N | -4.54337100184769 | 3.22333747175374 | 16.05578798381459 |
| N | -4.31570966634621 | 5.71297270856114 | 15.29508514165765 |
| O | -3.53430813057193 | 2.28005591013316 | 13.57559585408074 |
| O | -3.33259535296099 | 4.93632088165731 | 12.74912216501084 |

**(9) [Cu(dpa)(dpc)]**

|   |                  |                   |                  |
|---|------------------|-------------------|------------------|
| C | 1.24078335434200 | 5.20720171362216  | 6.09620016296268 |
| H | 0.71241103973380 | 5.65812978584819  | 5.26443660726232 |
| C | 1.15287447123185 | 5.73780901650568  | 7.36838058887060 |
| H | 0.55066626097864 | 6.61522444376807  | 7.55721152768347 |
| C | 1.87380732692411 | 5.11270884288460  | 8.38497314483606 |
| H | 1.84934880251084 | 5.49815229117534  | 9.39640792695307 |
| C | 2.61716949403242 | 3.98830917389577  | 8.09524601452686 |
| H | 3.17517967619053 | 3.47548168485073  | 8.86884132304962 |
| C | 2.63224564539672 | 3.51348324591432  | 6.77409059732877 |
| C | 3.32739664095597 | 1.48814989019179  | 5.42919632980825 |
| C | 3.69550618482269 | 0.14905496751062  | 5.64689533623336 |
| H | 3.99403505148263 | -0.17142911134572 | 6.63690126901284 |
| C | 3.64547679794389 | -0.74346920388493 | 4.59969315139464 |
| H | 3.92456846548699 | -1.77754209127395 | 4.75790748928150 |
| C | 3.20878311009849 | -0.30826052885769 | 3.34844888299263 |
| H | 3.13020598460712 | -0.98150518372182 | 2.50710115120412 |
| C | 2.88041759816149 | 1.02191688915150  | 3.20605075108068 |
| H | 2.52942381138015 | 1.42681013632371  | 2.26580011570249 |
| C | 1.09638379159902 | 4.73650591721100  | 1.68239269428309 |
| C | 2.18116510479685 | 5.80586636148633  | 1.81226583348287 |
| C | 2.32078587020877 | 6.97498622820130  | 1.07887282512590 |
| H | 1.58057653061594 | 7.22677936202934  | 0.33208868860665 |
| C | 3.43258226585300 | 7.77850626808794  | 1.33213401956735 |
| H | 3.56778572171505 | 8.69642744597177  | 0.77295183062002 |
| C | 4.38048824092901 | 7.40564976238031  | 2.28474495273935 |
| H | 5.26229824958721 | 7.99704396588617  | 2.48868599835410 |
| C | 4.17751646006420 | 6.22200724900234  | 2.98002454054161 |
| C | 5.08978121806561 | 5.57436634549023  | 4.02307853356076 |
| N | 1.97487827971098 | 4.12850469792849  | 5.79513316953405 |
| N | 2.96703230589560 | 1.91168261693304  | 4.21204538683146 |
| N | 3.09276583484692 | 5.49977740822360  | 2.72777210240762 |

|    |                  |                  |                  |
|----|------------------|------------------|------------------|
| N  | 3.34950615636753 | 2.35062064409731 | 6.50951081540420 |
| H  | 3.80512007625429 | 1.96632817452738 | 7.32031993453726 |
| O  | 1.28347713898511 | 3.72327924767541 | 2.47077690952524 |
| O  | 4.66021516300577 | 4.42360979979593 | 4.42956131034368 |
| O  | 0.19005292706935 | 4.89138682322461 | 0.88409940504669 |
| O  | 6.10560881726333 | 6.15101473498054 | 4.37198167348551 |
| Cu | 2.86225913088600 | 3.85983298430843 | 3.69039400581840 |

**(10) [Cu(acac)<sub>2</sub>]**

|    |                   |                   |                   |
|----|-------------------|-------------------|-------------------|
| Cu | 0.00011269107690  | -0.00010655450017 | 0.00021829953139  |
| C  | 4.19831519117458  | 0.49151880183634  | -0.00511544106359 |
| C  | 2.73928441774978  | 0.87374821126072  | -0.00433937371425 |
| O  | 1.92869733208084  | -0.10406594990687 | -0.00144550880682 |
| C  | 2.37677840174611  | 2.22597628947177  | -0.00639447751561 |
| C  | 1.05112707898334  | 2.67601612424226  | -0.00533040375524 |
| O  | 0.02261098291474  | 1.93091989856156  | -0.00249962734297 |
| C  | 0.76455740882183  | 4.15681821436628  | -0.00774795882902 |
| H  | 4.40990576254812  | -0.11688987770145 | 0.87671688315270  |
| H  | 4.85541869842753  | 1.35937195426886  | -0.01169040311423 |
| H  | 4.40630040245571  | -0.12799976715212 | -0.87997012086716 |
| H  | 3.16469650522948  | 2.96406957440951  | -0.00894171979219 |
| H  | 0.16476473014326  | 4.40438860128202  | -0.88608620889346 |
| H  | 1.67317710531144  | 4.75630483958072  | -0.00952761660877 |
| H  | 0.16606037230649  | 4.40753720636089  | 0.87057062607960  |
| O  | -1.92847575822158 | 0.10385109174799  | 0.00122458640965  |
| C  | -2.73906849672132 | -0.87395956772708 | 0.00349946547037  |
| C  | -4.19809838780682 | -0.49172665046576 | 0.00286090122358  |
| H  | -4.40886454201954 | 0.11658424792632  | -0.87923621834398 |
| H  | -4.85520976550225 | -1.35957754903208 | 0.00892304945636  |
| H  | -4.40689750496381 | 0.12788983238031  | 0.87745233275547  |
| C  | -2.37656790674727 | -2.22618861745747 | 0.00603811754606  |
| C  | -1.05091657762163 | -2.67622956529414 | 0.00609761548197  |
| O  | -0.02239879146381 | -1.93113374794975 | 0.00400498377149  |
| C  | -0.76434953123148 | -4.15703172536041 | 0.00884546823453  |
| H  | -0.16535369586491 | -4.40455425760109 | 0.88774188705204  |
| H  | -1.67297057470035 | -4.75651814395016 | 0.00984831800922  |
| H  | -0.16505632146618 | -4.40779872200275 | -0.86891526911889 |
| H  | -3.16448904963916 | -2.96428067459427 | 0.00791204859175  |

**(11) [Cu(mpsme)(NCS)]**

|    |                   |                   |                  |
|----|-------------------|-------------------|------------------|
| Cu | 1.74856328805025  | 1.03999089699846  | 4.12158878487229 |
| S  | 1.72858700812128  | 2.94225126925456  | 5.43429450167025 |
| S  | 3.71334136505649  | 3.41793692422515  | 7.68971092054726 |
| S  | -1.86815489798471 | 2.87075517257520  | 1.95355674901700 |
| N  | 2.31127052703020  | -0.93901500096188 | 3.24059276379496 |
| N  | 3.28827744263793  | 0.54180304078943  | 5.24745706804952 |
| N  | 3.74896664042598  | 1.31895591435763  | 6.24277304742261 |
| N  | 0.28222191540855  | 1.49140576388490  | 3.05921002565497 |

|   |                   |                   |                  |
|---|-------------------|-------------------|------------------|
| C | 0.63447731108953  | -1.13242402088255 | 1.46403194266083 |
| H | 0.86502838987087  | -0.16575929954697 | 1.01641584810677 |
| H | -0.21798925654140 | -0.96587371877315 | 2.12229190438254 |
| H | 0.34841994583820  | -1.83063717956531 | 0.67908015434848 |
| C | 1.80755977924960  | -1.66014054996062 | 2.23059187204837 |
| C | 2.37018317916976  | -2.89849184213266 | 1.88917775393689 |
| H | 1.94433686182806  | -3.46025756902818 | 1.06927659537379 |
| C | 3.45426411394573  | -3.38790703122882 | 2.59480961696633 |
| H | 3.89307429370770  | -4.34327112750704 | 2.33598831571439 |
| C | 3.97047075280189  | -2.63534017955757 | 3.63863236831673 |
| H | 4.81754669863673  | -2.97632348803012 | 4.21859896177036 |
| C | 3.37293141689409  | -1.41405565018653 | 3.93325100817901 |
| C | 3.87193350554411  | -0.58355180221256 | 5.01091772477746 |
| H | 4.72117416366032  | -0.89419745444831 | 5.61080921471088 |
| C | 3.07452714181546  | 2.44308042086770  | 6.38395567227372 |
| C | 2.65244387037158  | 4.88571159806162  | 7.69952860184508 |
| H | 3.03908448382608  | 5.50302986018671  | 8.51026437712430 |
| H | 1.61693452252059  | 4.62194863745339  | 7.90289322196410 |
| H | 2.72355000831837  | 5.42967793226821  | 6.76029169534682 |
| C | -0.62646447129339 | 2.10038848309926  | 2.61258928912397 |

**(12) [Cu(sct)(dbpy)]**

|    |                   |                  |                  |
|----|-------------------|------------------|------------------|
| Cu | 8.04531034067529  | 4.86770068811631 | 3.25799671466181 |
| S  | 10.29975583047287 | 5.18219369468177 | 3.57415211505016 |
| O  | 6.12871193458282  | 5.11933299536894 | 3.13257954140568 |
| N  | 7.98828546834352  | 4.46942885703126 | 5.18859803507015 |
| N  | 9.14843600055993  | 4.38631063439863 | 5.91943092306330 |
| N  | 11.43048897955901 | 4.58784850657846 | 5.89882602392506 |
| N  | 8.11212823079986  | 5.35368509263443 | 1.21352817089516 |
| N  | 8.11348789173602  | 2.80046873821752 | 2.06132782566810 |
| C  | 5.23804963245765  | 4.79837789832554 | 4.01953201160422 |
| C  | 3.86426452758724  | 4.88836333488355 | 3.67716193433268 |
| H  | 3.62686675670434  | 5.22458127012952 | 2.67537843995991 |
| C  | 2.86900791072089  | 4.56224550101754 | 4.57215002163305 |
| H  | 1.83154560362621  | 4.64274131931490 | 4.26690527221155 |
| C  | 3.18012919805704  | 4.12993433539697 | 5.86930470469266 |
| H  | 2.39553591766612  | 3.87660299013986 | 6.57016074085172 |
| C  | 4.50488475619688  | 4.04085251666840 | 6.23547802063115 |
| H  | 4.76612877791753  | 3.71784395762747 | 7.23782958864807 |
| C  | 5.55294372922499  | 4.36114351653169 | 5.34688179938964 |
| C  | 6.89227351750895  | 4.26882743865634 | 5.84993036194130 |
| H  | 7.01063019034121  | 4.01958502187881 | 6.90370626091603 |
| C  | 10.23269439431270 | 4.68047763965294 | 5.25498797397534 |
| C  | 11.58845383582790 | 4.36132403594497 | 7.32969877409298 |
| H  | 10.81184318664945 | 3.64852253245316 | 7.61687833943928 |
| C  | 11.39263172374004 | 5.64225377821569 | 8.15596259596636 |
| H  | 12.10844545019075 | 6.39662185604718 | 7.80719671982947 |
| H  | 10.39287946773271 | 6.03781825665173 | 7.96822401948913 |
| C  | 11.60451532202463 | 5.38560973440400 | 9.65087598697100 |

|   |                   |                   |                   |
|---|-------------------|-------------------|-------------------|
| H | 11.49338192919930 | 6.31883397898881  | 10.20979140757722 |
| H | 10.82019444457720 | 4.71218936471858  | 10.01602025613494 |
| C | 12.97512504264230 | 4.76069486884944  | 9.92511866259500  |
| H | 13.08619549450156 | 4.53859087564278  | 10.99025742572172 |
| H | 13.75877584896427 | 5.48592458194482  | 9.67516587452664  |
| C | 13.18248404790082 | 3.48887631603307  | 9.09756581348371  |
| H | 12.48165470823320 | 2.71863285840184  | 9.43980193278210  |
| H | 14.18634322709533 | 3.08735596435759  | 9.26159187484256  |
| C | 12.96024621666209 | 3.73786700372313  | 7.60231836359509  |
| H | 13.74025610318172 | 4.41486129233007  | 7.22893211464626  |
| H | 13.05541022240191 | 2.80599446150958  | 7.03889250367822  |
| C | 7.99469369626236  | 6.62867204119276  | 0.84239964531682  |
| H | 7.97622078782648  | 7.35679137574857  | 1.64321696851072  |
| C | 7.89795785960463  | 7.02071806894207  | -0.48009270238251 |
| H | 7.80395443038913  | 8.07169337130199  | -0.72230833555736 |
| C | 7.91304407312228  | 6.04960520751177  | -1.48072553586843 |
| C | 7.78996540697388  | 6.42429207179703  | -2.93060288461756 |
| H | 7.85187872644012  | 5.54975182013807  | -3.57775349683701 |
| H | 8.58018273738360  | 7.12047668047349  | -3.22079947361681 |
| H | 6.83597149982519  | 6.92160818077920  | -3.12182549197612 |
| C | 8.03570774755450  | 4.72492469627892  | -1.07811765957843 |
| H | 8.03239377147148  | 3.94443109887608  | -1.82563917936497 |
| C | 8.13856379006375  | 4.39715397510660  | 0.27473618602304  |
| C | 8.26731774755336  | 2.99097086842313  | 0.74895183242401  |
| C | 8.54400615367080  | 1.92824204080939  | -0.11402454158824 |
| H | 8.69466474362568  | 2.09942372908412  | -1.17093187166570 |
| C | 8.64863522207005  | 0.63358402753769  | 0.38381431832543  |
| C | 8.95326090371289  | -0.53273193548416 | -0.51432717663356 |
| H | 9.00720161288850  | -0.23025910529450 | -1.56001134805856 |
| H | 8.18751892466579  | -1.30622707430172 | -0.42202082452185 |
| H | 9.90823823478117  | -0.99050892966018 | -0.24476751216527 |
| C | 8.47047490379036  | 0.46058368499321  | 1.75614274654906  |
| H | 8.53742932571431  | -0.52233322395915 | 2.20614429980356  |
| C | 8.21355214148708  | 1.56822745621078  | 2.54870700629944  |
| H | 8.08435991319564  | 1.46800604648486  | 3.62067822635285  |
| H | 12.22171078534971 | 4.94879711954222  | 5.39197365892865  |

**(13) [Cu(spt)(DMF)]**

|    |                   |                   |                   |
|----|-------------------|-------------------|-------------------|
| Cu | 2.43473070655123  | 1.41424201224545  | 1.22240092350480  |
| S  | 1.44369917385587  | 1.79204040958748  | 3.38890353036064  |
| O  | 2.42443574013807  | 0.56324947003638  | -0.53400914270161 |
| O  | -2.28487569263889 | -0.83179774858529 | -4.36837539304272 |
| O  | -2.86415655493171 | 1.17116084262515  | -3.78120608823848 |
| N  | 0.95347625672529  | 2.65722274747000  | 0.70064871255318  |
| N  | 0.11830441242472  | 3.17874402527508  | 1.44689291658834  |
| N  | -0.55382106936473 | 3.57907750861921  | 3.61499522264648  |
| N  | -2.09843592889086 | 0.20954703111162  | -3.74646105459113 |
| C  | 0.46390162401206  | 1.59461618999576  | -1.43048078302778 |
| C  | 1.37326991849744  | 0.50311560427680  | -1.29410837996914 |

|   |                   |                   |                   |
|---|-------------------|-------------------|-------------------|
| C | 1.09810313450664  | -0.66762644972527 | -2.04667414787990 |
| C | -0.01850388445056 | -0.76334781751849 | -2.84407804778013 |
| C | -0.90912260650609 | 0.31058389637660  | -2.92253725632888 |
| C | -0.66689215758348 | 1.48420593331830  | -2.21637072097135 |
| C | 0.78254340827203  | 2.89597382653586  | -0.73781990781307 |
| C | 0.29228583408823  | 2.89018880449817  | 2.84776758740444  |
| C | -0.58145559008407 | 3.41287436812380  | 5.07441784538687  |
| C | -1.97313264030461 | 2.98200059237643  | 5.54163795465490  |
| C | -3.05217396932247 | 3.95219767945480  | 5.05886873025571  |
| C | -2.95590543457021 | 4.15754586417425  | 3.54665120503081  |
| C | -1.54279748096984 | 4.55989334557430  | 3.12200135175528  |
| O | 3.99299730805056  | 0.73236192135424  | 1.89943710430168  |
| C | 5.04032291599134  | 0.64685391591906  | 1.00286052981121  |
| N | 5.43606593749106  | 1.96009147557776  | 0.48200886532052  |
| C | 6.26702166216835  | 1.85125882943472  | -0.70451970296641 |
| C | 6.06020844312891  | 2.78328466994129  | 1.50632413411182  |
| H | 1.79340835580376  | -1.49232247208937 | -1.96180738871363 |
| H | -0.22854448513374 | -1.66201617181822 | -3.40606001081730 |
| H | -1.36586824388824 | 2.30388547497589  | -2.31103481257556 |
| H | 0.00416258538130  | 3.64085958546099  | -0.89804415314562 |
| H | 1.75133151711547  | 3.27727431434748  | -1.07820148234455 |
| H | -0.31272568927836 | 4.37789463627453  | 5.51775121951844  |
| H | 0.17750122643047  | 2.69019439045221  | 5.35654913764754  |
| H | -1.96465957153803 | 2.91846562610036  | 6.63200528096900  |
| H | -2.17549522405017 | 1.97495808051662  | 5.16506160237063  |
| H | -4.04312101875980 | 3.58204407584374  | 5.32917293982614  |
| H | -2.92854203752338 | 4.91600906456638  | 5.56542697423459  |
| H | -3.23464439860582 | 3.23826202311452  | 3.02285610151702  |
| H | -3.64763539366691 | 4.93521697298411  | 3.21463380622061  |
| H | -1.45884986784758 | 4.64125167138097  | 2.04611914616048  |
| H | -1.27809925488806 | 5.52708555432236  | 3.56285101258573  |
| H | 4.78027578981985  | 0.02579583899982  | 0.13600584376182  |
| H | 5.88850184214402  | 0.16192244942978  | 1.52782894353748  |
| H | 5.74368454516643  | 1.27662651271941  | -1.47037762937091 |
| H | 7.24024674105956  | 1.36476432737140  | -0.51203617044352 |
| H | 6.47117868081556  | 2.84740268042149  | -1.10349216627979 |
| H | 5.41806495598269  | 2.81428630900935  | 2.38580288275043  |
| H | 6.19647980109505  | 3.80198658320234  | 1.13580552227055  |
| H | 7.04855065008146  | 2.39761255034001  | 1.81573590694415  |

**(14) [Cu(tct)<sub>2</sub>]**

|    |                   |                   |                   |
|----|-------------------|-------------------|-------------------|
| Cu | 0.36282599706730  | -0.74364017520631 | 0.03155959414245  |
| S  | -0.13572710035083 | -1.61371668358034 | -2.03101410738500 |
| S  | 3.90264204786505  | 2.15427371378890  | -2.66540140196895 |
| N  | 1.93355721244675  | 0.14366242709152  | -2.29389665288248 |
| N  | 1.75966023777045  | 0.32177179778867  | -0.95841472125766 |
| N  | 1.23310831730244  | -0.89471985218435 | -4.18725245274870 |
| C  | 1.11056015973578  | -0.71265654815736 | -2.84789288055195 |
| C  | 2.49069293060627  | 1.22942767696524  | -0.38966095449193 |

|   |                   |                   |                   |
|---|-------------------|-------------------|-------------------|
| C | 3.45959637461920  | 2.10070223580366  | -0.98507949405622 |
| C | 4.17957043102872  | 3.04050355099619  | -0.26760937769964 |
| C | 5.07090454380822  | 3.78965681570814  | -1.05915136075660 |
| C | 5.02558298703616  | 3.41654945478356  | -2.37721688507337 |
| H | 2.34238786686835  | 1.33945948728091  | 0.67754880993497  |
| H | 0.75872325308198  | -1.66732846787100 | -4.61781699464442 |
| H | 2.04197327190342  | -0.50768598520576 | -4.64502579388392 |
| H | 4.05568494373590  | 3.17212010898012  | 0.79881438278259  |
| H | 5.71595789238731  | 4.56738319399327  | -0.67582543969568 |
| H | 5.60114643555542  | 3.82380614605592  | -3.19406067144999 |
| S | 1.27971080072875  | -0.71278601575652 | 2.13400508019883  |
| S | -4.18664591263859 | -1.59224141353096 | 2.63585825243617  |
| N | -1.38089640059087 | -1.27942392979548 | 2.34058670631735  |
| N | -1.36700976307411 | -1.13756230084554 | 0.98962735445071  |
| N | -0.18548411341091 | -1.28614823026605 | 4.26936396836850  |
| C | -0.21987076094556 | -1.11175309282284 | 2.92528391083152  |
| C | -2.51148581490747 | -1.20492963558518 | 0.38330166293780  |
| C | -3.81401060223380 | -1.39561317889017 | 0.94898769848310  |
| C | -4.97214178490574 | -1.44354815918285 | 0.19217129902664  |
| C | -6.13743886315851 | -1.63375997045412 | 0.95919925498508  |
| C | -5.86133186912376 | -1.73012063212206 | 2.29820888468809  |
| H | -2.47004817736834 | -1.09894621448702 | -0.69379316815958 |
| H | 0.63421932738079  | -1.01532254928643 | 4.78033356270251  |
| H | -1.05619544340977 | -1.39904616686034 | 4.76112094653762  |
| H | -4.96294991226307 | -1.34329563147547 | -0.88475384579263 |
| H | -7.13326155812289 | -1.69718146452637 | 0.54420610231047  |
| H | -6.56400695442407 | -1.87789031114359 | 3.10368873136435  |

**(15) [Cu(eLys)]**

|    |                   |                   |                   |
|----|-------------------|-------------------|-------------------|
| Cu | 0.09129697125933  | -0.00930005588848 | 0.10001620876379  |
| S  | -0.33135873055643 | -1.30659893869216 | -1.67548935059201 |
| S  | -1.34864882645196 | 1.70499307054998  | 0.00253757529759  |
| N  | 1.13030187941693  | -1.64797892243202 | 1.00288756904337  |
| N  | 1.29156888167646  | 1.12224478818423  | 1.46009506269159  |
| C  | 0.21953664123259  | -2.87837371674802 | -0.91799354892453 |
| C  | 1.43948325725544  | -2.67504533507998 | -0.00194715016882 |
| C  | 2.27962225404060  | -1.09577239371358 | 1.74402349712340  |
| C  | 1.85126536069547  | 0.18411155456365  | 2.45132521634043  |
| C  | 0.52519168856798  | 2.25419667293755  | 2.00006528520118  |
| C  | -0.28170373463716 | 2.91337801293231  | 0.86729276660086  |
| C  | 1.81706451176761  | -3.99023347184114 | 0.67054858957310  |
| C  | 1.45441893601328  | 3.27466254391707  | 2.64807365743979  |
| C  | 2.84352452014090  | -6.09325677440658 | 0.35057498441667  |
| C  | 1.55973940564762  | 5.12986196675972  | 4.10639034139492  |
| O  | 2.50628912219570  | -4.78659871109270 | -0.15525814163333 |
| O  | 0.79440756707888  | 4.07261339599861  | 3.49558228347767  |
| H  | 0.48432807499909  | -3.57554819119541 | -1.71334051941365 |
| H  | -0.59265277233435 | -3.32994907653738 | -0.34032828200241 |
| H  | 2.27154621116249  | -2.32239094173526 | -0.61220316512320 |



|   |                   |                   |                   |
|---|-------------------|-------------------|-------------------|
| H | 2.68576265101454  | -1.80961858184309 | 2.46717529284131  |
| H | 3.06682691525662  | -0.87227232468653 | 1.01959532188326  |
| H | 1.06621928780989  | -0.04013344007964 | 3.17783887870266  |
| H | 2.69604036306825  | 0.61600360734612  | 2.99640333628644  |
| H | -0.17639681827114 | 1.87377917944297  | 2.74311816672542  |
| H | -0.91094799141019 | 3.69741696658608  | 1.28912633053646  |
| H | 0.40829391702147  | 3.38754510669741  | 0.16276890378953  |
| H | 3.38573651436997  | -6.58341936344621 | -0.45285390450267 |
| H | 1.93929125840442  | -6.64735593860769 | 0.59904341994076  |
| H | 3.46743511743381  | -6.00589871149050 | 1.23924164048217  |
| H | 0.85955338531753  | 5.66301067492962  | 4.74299077651342  |
| H | 1.96669565225711  | 5.79157887624735  | 3.34290055404003  |
| H | 2.37657260437307  | 4.71442164652651  | 4.69514365937844  |
| O | 1.50065436349498  | -4.28993310616652 | 1.79716566506204  |
| O | 2.63248164113682  | 3.37254537098916  | 2.39938303172754  |
| H | 0.48669141799621  | -2.06764779855925 | 1.67266222533205  |
| H | 2.06053174455608  | 1.51237726663380  | 0.91653457475465  |

**(16) [Cu(tox)<sub>2</sub>]**

|    |                   |                   |                   |
|----|-------------------|-------------------|-------------------|
| Cu | -0.00000944068715 | -0.00002652518529 | -0.00030541958077 |
| S  | 0.24315167447678  | 2.27143115427292  | -0.00280858400209 |
| N  | -2.04825082280024 | 0.38825064690839  | -0.00162183460920 |
| C  | -2.96377960177276 | -0.56295490967432 | -0.00086461094839 |
| C  | -4.34187875008024 | -0.29849420788908 | -0.00184601129056 |
| C  | -4.76716659560250 | 1.00314644590706  | -0.00367412971036 |
| C  | -3.82315563237510 | 2.05111241431052  | -0.00452355585244 |
| C  | -4.19389014217072 | 3.41462895751912  | -0.00639426472800 |
| C  | -3.21761489362566 | 4.37928774058270  | -0.00711957110220 |
| C  | -1.85616237379611 | 4.03375267385533  | -0.00602396916898 |
| C  | -1.44062422698767 | 2.71186833201635  | -0.00416949618117 |
| C  | -2.44137820057974 | 1.69776486321447  | -0.00341558801052 |
| H  | -2.60874534941296 | -1.58440852172295 | 0.00058645142682  |
| H  | -5.03885397787174 | -1.12535684100918 | -0.00114357698410 |
| H  | -5.82413524192371 | 1.24363283895998  | -0.00448050053468 |
| H  | -5.24425853965548 | 3.67746874906036  | -0.00722380421693 |
| H  | -3.49248418294903 | 5.42712339403874  | -0.00855413219558 |
| H  | -1.10737492644386 | 4.81547177226534  | -0.00662077666342 |
| S  | -0.24317029310283 | -2.27148502756211 | 0.00176249117180  |
| N  | 2.04823180063889  | -0.38830360049584 | 0.00134441643872  |
| C  | 1.44060552843880  | -2.71192182899080 | 0.00338400094912  |
| C  | 2.96376049870850  | 0.56290225279051  | 0.00094827861144  |
| C  | 2.44135929882386  | -1.69781801820150 | 0.00297513656949  |
| C  | 1.85614355922968  | -4.03380643053803 | 0.00512166553734  |
| C  | 4.34185951155991  | 0.29844163225469  | 0.00212594465587  |
| H  | 2.60872632757877  | 1.58435610344511  | -0.00034605172888 |
| C  | 3.82313659654488  | -2.05116552696159 | 0.00427042649430  |
| C  | 3.21759596356352  | -4.37934140346230 | 0.00639474522665  |
| H  | 1.10735627222576  | -4.81552580632982 | 0.00547320698014  |
| C  | 4.76714741510999  | -1.00319923498397 | 0.00378062369913  |

|   |                  |                   |                  |
|---|------------------|-------------------|------------------|
| H | 5.03883462278960 | 1.12530455083663  | 0.00171232175454 |
| C | 4.19387102960524 | -3.41468230837555 | 0.00598529476421 |
| H | 3.49246521143211 | -5.42717720707546 | 0.00771776595519 |
| H | 5.82411595796436 | -1.24368562277294 | 0.00473347093966 |
| H | 5.24423940414685 | -3.67752177300749 | 0.00695648433385 |

**(17) [Cu(dtc)<sub>2</sub>]**

|    |                   |                   |                   |
|----|-------------------|-------------------|-------------------|
| Cu | -0.00003745870713 | 0.00031455500636  | 0.00043544654246  |
| C  | -4.90231782536811 | -1.22350319913538 | 0.06822406053126  |
| C  | -4.90202428492746 | 1.22444435898848  | -0.08258478608238 |
| S  | -1.84343944651585 | -1.44552666600049 | 0.04828926302153  |
| S  | -1.84322212369754 | 1.44634468667883  | -0.05295022073736 |
| S  | 1.84342349082921  | 1.44610297835482  | -0.04695819872895 |
| S  | 1.84311816044093  | -1.44578448957738 | 0.05377999448697  |
| C  | 2.77858039520616  | 0.00009853367474  | 0.00465007669769  |
| C  | 4.90230409755461  | 1.22396776193489  | -0.06724035117535 |
| C  | 4.90192470244243  | -1.22400948113229 | 0.08306082240975  |
| H  | 5.41071583180377  | 1.40510135002642  | 0.88394772273930  |
| H  | -5.41360575444383 | 1.40574554069459  | 0.86686839906188  |
| H  | 4.26052644063251  | 2.06896090784648  | -0.29515928748891 |
| H  | -4.25942429763398 | 2.06935965582643  | -0.30846773506714 |
| H  | -5.65311730212538 | 1.12093783582118  | -0.86913897873041 |
| H  | 5.65602075597388  | 1.12051164731753  | -0.85128448174547 |
| H  | -5.41049952592437 | -1.40493474727916 | -0.88303086914093 |
| H  | -4.26054884094923 | -2.06839970411036 | 0.29652895452400  |
| H  | -5.65622004884298 | -1.11986093757024 | 0.85206365208736  |
| H  | 5.41329385065707  | -1.40519689641353 | -0.86652925651437 |
| H  | 4.25933074003118  | -2.06892725549871 | 0.30895492871705  |
| H  | 5.65319090070810  | -1.12065334163126 | 0.86946812582482  |
| N  | 4.11446959994680  | 0.00002490916533  | 0.00667810068510  |
| C  | -2.77863883827080 | 0.00043398031289  | -0.00369862024338 |
| N  | -4.11452760082000 | 0.00045870569982  | -0.00584596967453 |

**(18) [Cu(ttcn)<sub>2</sub>]<sup>2+</sup>**

|    |                   |                   |                  |
|----|-------------------|-------------------|------------------|
| C  | 13.39618716119780 | -1.40773209973671 | 4.58757371520757 |
| C  | 13.65018547302069 | 0.04723429787833  | 4.97216103270781 |
| C  | 11.35293744880155 | -2.81258161376113 | 3.12597916256775 |
| C  | 11.51137638228967 | -1.94989925700434 | 1.88228768999857 |
| Cu | 10.28710417015302 | 0.00000089896149  | 4.34158115048898 |
| S  | 10.54981755790392 | -0.38413149346065 | 1.97007131065877 |
| S  | 12.66401383434905 | 1.33320850484186  | 4.12950835265486 |
| S  | 11.64466628801289 | -1.95888242817653 | 4.71886003834683 |
| C  | 11.76178521854994 | 0.90043719693084  | 1.48548752973081 |
| C  | 13.01092557919842 | 1.05763929252424  | 2.35054426609452 |
| S  | 10.02438998584242 | 0.38413272589856  | 6.71309031220632 |
| S  | 7.91019694161065  | -1.33320771710912 | 4.55365033446879 |
| S  | 8.92954194558863  | 1.95888454364162  | 3.96430163688539 |
| C  | 9.06282909689783  | 1.94989906837657  | 6.80087421696232 |

|   |                   |                   |                  |
|---|-------------------|-------------------|------------------|
| C | 8.81242333335529  | -0.90043774471878 | 7.19767199807188 |
| C | 6.92402505373195  | -0.04723411424282 | 3.71099702885456 |
| C | 7.56328362903203  | -1.05764016487808 | 6.33261437317666 |
| C | 7.17802148008021  | 1.40773238838573  | 4.09558515681241 |
| C | 9.22126767943664  | 2.81258271023359  | 5.55718361644398 |
| H | 13.73130002864985 | -1.61742556912040 | 3.57409680463020 |
| H | 13.96611787557957 | -2.05403266593653 | 5.25675415139902 |
| H | 13.44530203512588 | 0.21856605697827  | 6.03008115622932 |
| H | 14.70857267409083 | 0.26360849670409  | 4.81788287297334 |
| H | 12.02342035856142 | -3.67246093085123 | 3.07792923798783 |
| H | 10.33756881851879 | -3.19930442863033 | 3.21974933097248 |
| H | 12.55177691048831 | -1.69461031426562 | 1.69314763438816 |
| H | 11.14700085385958 | -2.49821934073143 | 1.01244719308527 |
| H | 11.16755991867564 | 1.81540265369693  | 1.47660223367865 |
| H | 12.04667094016422 | 0.69641952760764  | 0.45147913408293 |
| H | 13.56137416764481 | 1.92652221344748  | 1.98699611638219 |
| H | 13.67739405270437 | 0.20252828508202  | 2.25531142616491 |
| H | 8.02242874277833  | 1.69460883852241  | 6.99001347063953 |
| H | 9.42720352525905  | 2.49821898708213  | 7.67071527140259 |
| H | 9.40664955068948  | -1.81540258342899 | 7.20655679776213 |
| H | 8.52753666713090  | -0.69642146972373 | 8.23168041743926 |
| H | 7.12890990222218  | -0.21856533525589 | 2.65307706287609 |
| H | 5.86563789808398  | -0.26360934128889 | 3.86527393124294 |
| H | 7.01283558883804  | -1.92652389491903 | 6.69616136899285 |
| H | 6.89681424774645  | -0.20252990817289 | 6.42784745717303 |
| H | 6.84290685097549  | 1.61742516006506  | 5.10906162270864 |
| H | 6.60809106291441  | 2.05403253137281  | 3.42640404227506 |
| H | 8.55078329601935  | 3.67246085015813  | 5.60523357525757 |
| H | 10.23663577422608 | 3.19930718702332  | 5.46341476791707 |
